# Supplementary material
Source: MDPI journal article supplement (https://www.mdpi.com/1424-8247/16/4/510)
Supplement: s1 [file s1]

Incidence of all-grade FAC

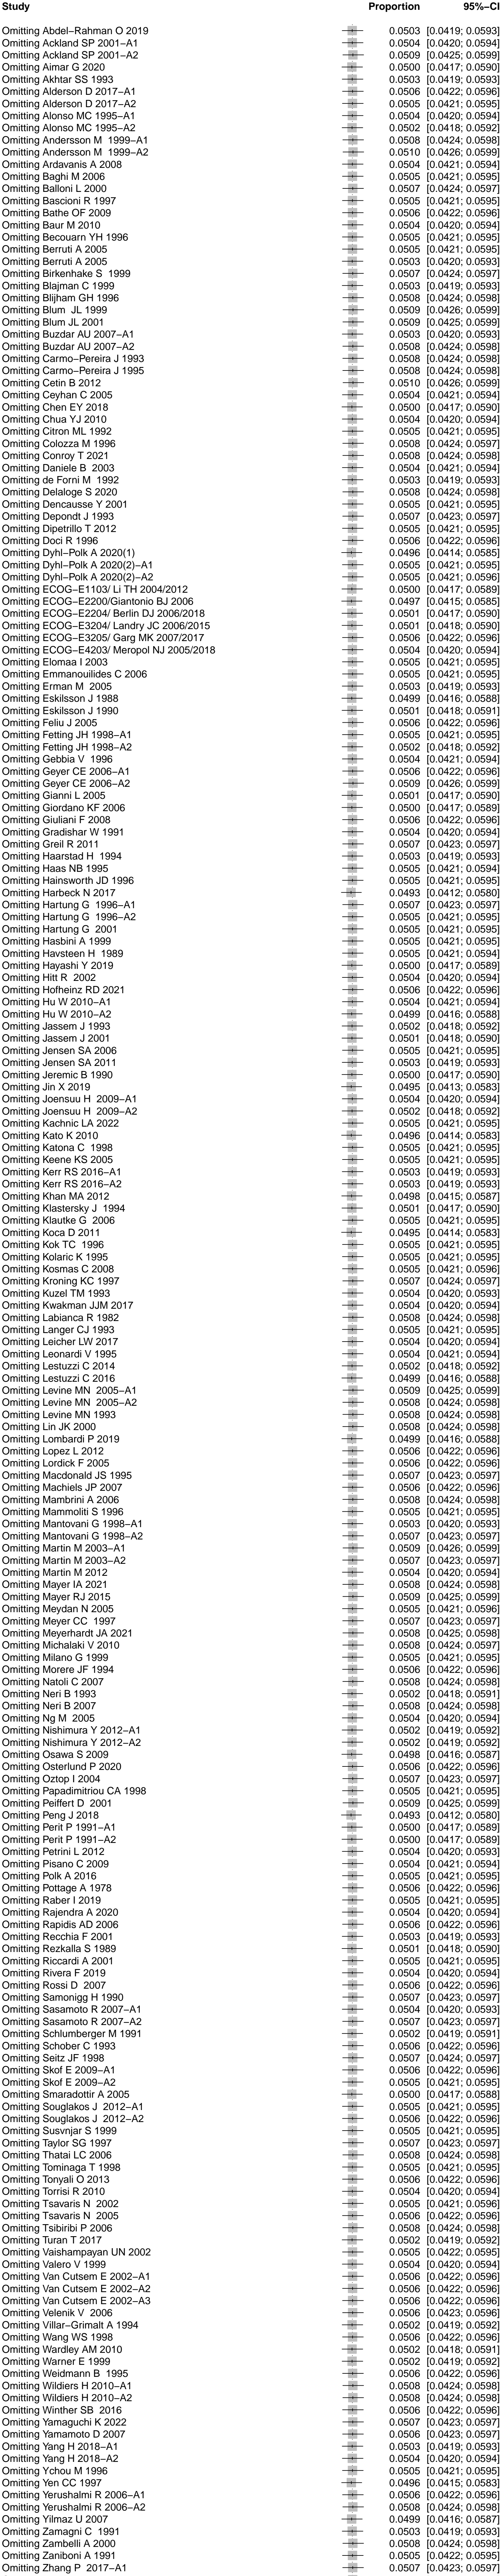

Incidence of grade 3 or higher FAC

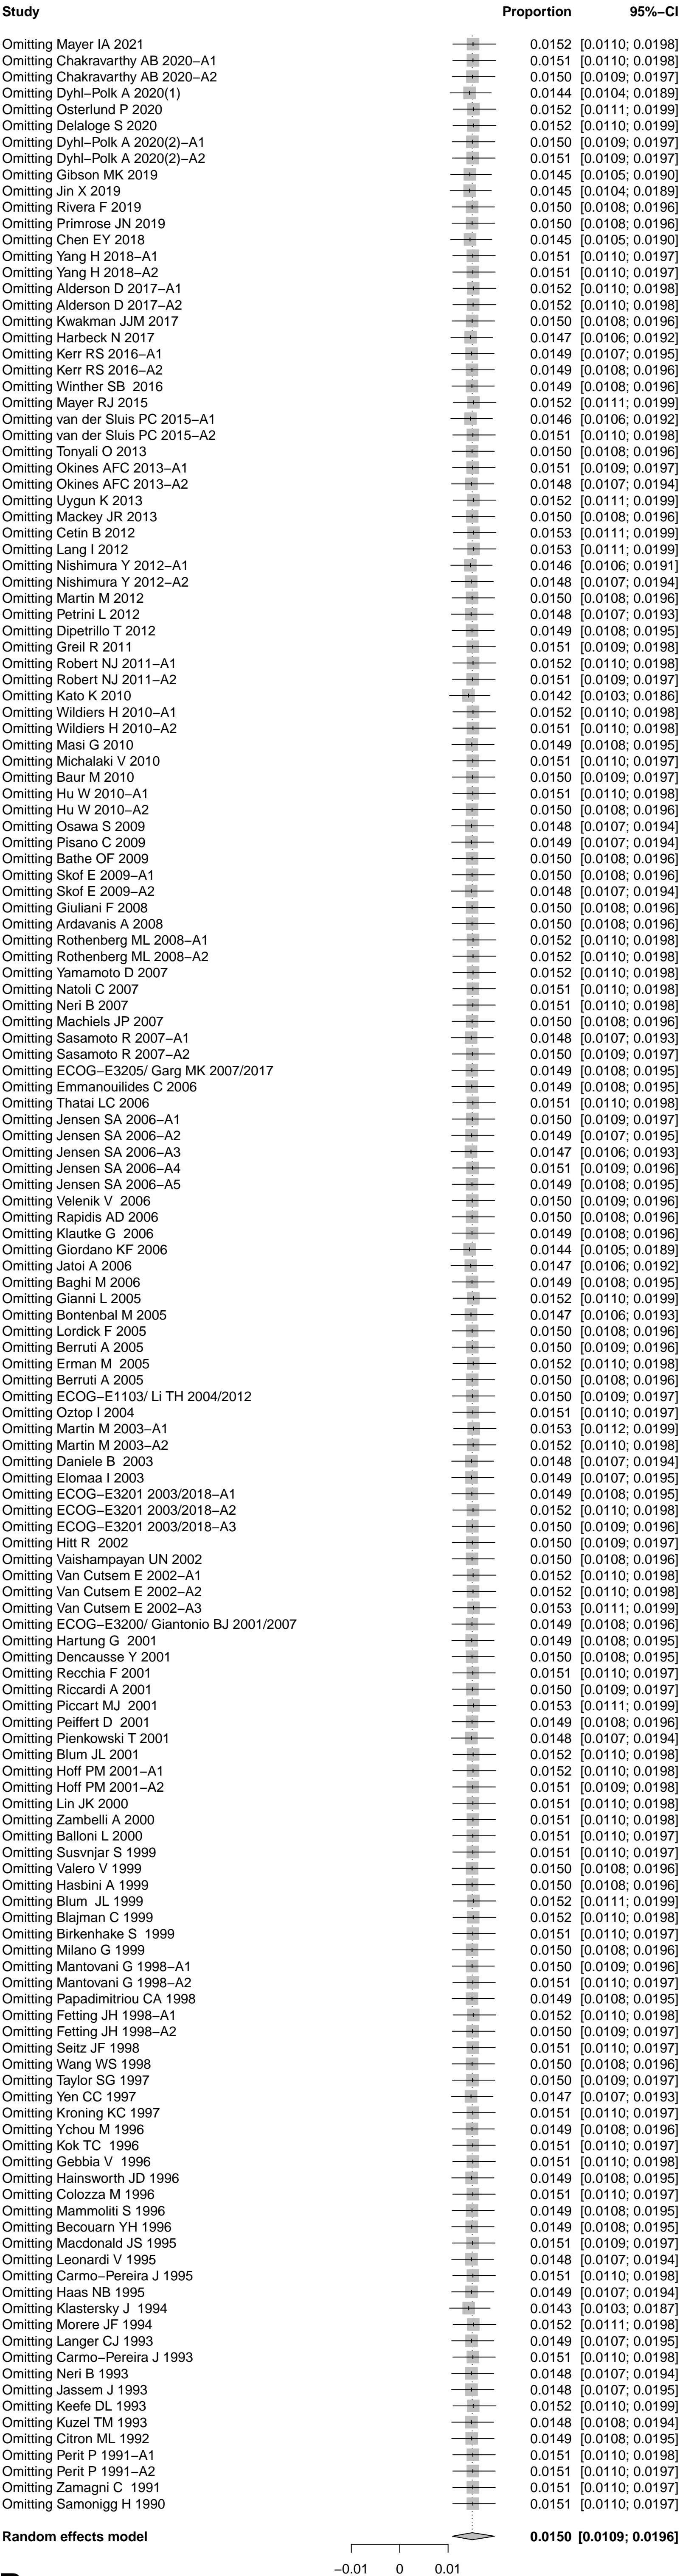

B

–0.01 0 0.01

## Incidence of grade 1-2 FAC

| Study                                | Proportion | 95%–CI           |
|--------------------------------------|------------|------------------|
| Omitting Mayer IA 2021               | 0.0237     | [0.0159; 0.0326] |
| Omitting Dyhl–Polk A 2020(1)         | 0.0224     | [0.0149; 0.0309] |
| Omitting Osterlund P 2020            | 0.0232     | [0.0155; 0.0321] |
| Omitting Delaloge S 2020             | 0.0237     | [0.0159; 0.0326] |
| Omitting Dyhl–Polk A 2020(2)–A1      | 0.0232     | [0.0155; 0.0322] |
| Omitting Dyhl–Polk A 2020(2)–A2      | 0.0233     | [0.0156; 0.0323] |
| Omitting Jin X 2019                  | 0.0221     | [0.0148; 0.0305] |
| Omitting Rivera F 2019               | 0.0232     | [0.0155; 0.0320] |
| Omitting Chen EY 2018                | 0.0232     | [0.0155; 0.0320] |
| Omitting Yang H 2018–A1              | 0.0229     | [0.0153; 0.0317] |
| Omitting Yang H 2018–A2              | 0.0231     | [0.0154; 0.0319] |
| Omitting Alderson D 2017–A1          | 0.0233     | [0.0155; 0.0322] |
| Omitting Alderson D 2017–A2          | 0.0232     | [0.0154; 0.0321] |
| Omitting Kwakman JJM 2017            | 0.0232     | [0.0154; 0.0321] |
| Omitting Harbeck N 2017              | 0.0218     | [0.0147; 0.0298] |
| Omitting Kerr RS 2016–A1             | 0.0231     | [0.0154; 0.0320] |
| Omitting Kerr RS 2016–A2             | 0.0230     | [0.0153; 0.0319] |
| Omitting Mayer RJ 2015               | 0.0238     | [0.0160; 0.0327] |
| Omitting Cetin B 2012                | 0.0239     | [0.0161; 0.0328] |
| Omitting Nishimura Y 2012–A1         | 0.0236     | [0.0159; 0.0325] |
| Omitting Nishimura Y 2012–A2         | 0.0232     | [0.0155; 0.0320] |
| Omitting Martin M 2012               | 0.0232     | [0.0155; 0.0321] |
| Omitting Petrini L 2012              | 0.0236     | [0.0159; 0.0325] |
| Omitting Greil R 2011                | 0.0236     | [0.0158; 0.0325] |
| Omitting Kato K 2010                 | 0.0225     | [0.0150; 0.0311] |
| Omitting Wildiers H 2010–A1          | 0.0237     | [0.0159; 0.0326] |
| Omitting Wildiers H 2010–A2          | 0.0237     | [0.0159; 0.0326] |
| Omitting Michalaki V 2010            | 0.0236     | [0.0159; 0.0325] |
| Omitting Baur M 2010                 | 0.0232     | [0.0154; 0.0320] |
| Omitting Hu W 2010–A1                | 0.0231     | [0.0154; 0.0319] |
| Omitting Hu W 2010–A2                | 0.0225     | [0.0150; 0.0310] |
| Omitting Osawa S 2009                | 0.0225     | [0.0151; 0.0311] |
| Omitting Pisano C 2009               | 0.0236     | [0.0159; 0.0325] |
| Omitting Bathe OF 2009               | 0.0236     | [0.0159; 0.0325] |
| Omitting Giuliani F 2008             | 0.0236     | [0.0159; 0.0325] |
| Omitting Ardavanis A 2008            | 0.0233     | [0.0156; 0.0321] |
| Omitting Yamamoto D 2007             | 0.0234     | [0.0157; 0.0323] |
| Omitting Natoli C 2007               | 0.0237     | [0.0159; 0.0325] |
| Omitting Neri B 2007                 | 0.0236     | [0.0159; 0.0325] |
| Omitting Machiels JP 2007            | 0.0236     | [0.0159; 0.0325] |
| Omitting Jensen SA 2006              | 0.0238     | [0.0160; 0.0327] |
| Omitting Rapidis AD 2006             | 0.0236     | [0.0159; 0.0325] |
| Omitting Giordano KF 2006            | 0.0233     | [0.0156; 0.0322] |
| Omitting Gianni L 2005               | 0.0225     | [0.0150; 0.0311] |
| Omitting Lordick F 2005              | 0.0237     | [0.0159; 0.0326] |
| Omitting Berruti A 2005              | 0.0230     | [0.0153; 0.0318] |
| Omitting Erman M 2005                | 0.0229     | [0.0152; 0.0317] |
| Omitting Berruti A 2005              | 0.0234     | [0.0156; 0.0323] |
| Omitting ECOG–E1103/ Li TH 2004/2012 | 0.0225     | [0.0150; 0.0312] |
| Omitting Oztop I 2004                | 0.0236     | [0.0159; 0.0325] |
| Omitting Martin M 2003–A1            | 0.0238     | [0.0161; 0.0327] |
| Omitting Martin M 2003–A2            | 0.0235     | [0.0157; 0.0324] |
| Omitting Daniele B 2003              | 0.0236     | [0.0159; 0.0325] |
| Omitting Elomaa I 2003               | 0.0236     | [0.0159; 0.0325] |
| Omitting Hitt R 2002                 | 0.0232     | [0.0154; 0.0320] |
| Omitting Vaishampayan UN 2002        | 0.0236     | [0.0159; 0.0325] |
| Omitting Van Cutsem E 2002–A1        | 0.0233     | [0.0156; 0.0322] |
| Omitting Van Cutsem E 2002–A2        | 0.0234     | [0.0156; 0.0323] |
| Omitting Van Cutsem E 2002–A3        | 0.0233     | [0.0155; 0.0322] |
| Omitting Hartung G 2001              | 0.0237     | [0.0159; 0.0326] |
| Omitting Dencausse Y 2001            | 0.0236     | [0.0159; 0.0325] |
| Omitting Recchia F 2001              | 0.0229     | [0.0153; 0.0317] |
| Omitting Riccardi A 2001             | 0.0233     | [0.0155; 0.0321] |
| Omitting Peiffert D 2001             | 0.0233     | [0.0156; 0.0322] |
| Omitting Blum JL 2001                | 0.0237     | [0.0160; 0.0326] |
| Omitting Lin JK 2000                 | 0.0236     | [0.0159; 0.0325] |
| Omitting Zambelli A 2000             | 0.0237     | [0.0159; 0.0326] |
| Omitting Balloni L 2000              | 0.0236     | [0.0159; 0.0325] |
| Omitting Susvnjar S 1999             | 0.0232     | [0.0156; 0.0321] |
| Omitting Valero V 1999               | 0.0231     | [0.0155; 0.0320] |
| Omitting Hasbini A 1999              | 0.0233     | [0.0156; 0.0322] |
| Omitting Blum JL 1999                | 0.0238     | [0.0161; 0.0327] |
| Omitting Blajman C 1999              | 0.0229     | [0.0152; 0.0316] |
| Omitting Birkenhake S 1999           | 0.0236     | [0.0159; 0.0325] |
| Omitting Milano G 1999               | 0.0236     | [0.0159; 0.0324] |
| Omitting Mantovani G 1998            | 0.0233     | [0.0156; 0.0321] |
| Omitting Papadimitriou CA 1998       | 0.0236     | [0.0159; 0.0325] |
| Omitting Fetting JH 1998–A1          | 0.0231     | [0.0154; 0.0320] |
| Omitting Fetting JH 1998–A2          | 0.0228     | [0.0151; 0.0315] |
| Omitting Seitz JF 1998               | 0.0236     | [0.0159; 0.0325] |
| Omitting Tominaga T 1998             | 0.0236     | [0               |



| Study                                  | Proportion | 95%-CI           |
|----------------------------------------|------------|------------------|
| Omitting Mayer IA 2021                 | 0.0233     | [0.0172; 0.0302] |
| Omitting Chakravarthy AB 2020–A1       | 0.0233     | [0.0171; 0.0302] |
| Omitting Chakravarthy AB 2020–A2       | 0.0232     | [0.0171; 0.0302] |
| Omitting Dyhl–Polk A 2020(1)           | 0.0222     | [0.0163; 0.0287] |
| Omitting Aimar G 2020                  | 0.0231     | [0.0169; 0.0300] |
| Omitting Osterlund P 2020              | 0.0231     | [0.0169; 0.0300] |
| Omitting Rajendra A 2020               | 0.0230     | [0.0169; 0.0299] |
| Omitting Delaloge S 2020               | 0.0233     | [0.0171; 0.0302] |
| Omitting Grierson P 2020               | 0.0231     | [0.0170; 0.0299] |
| Omitting Dyhl–Polk A 2020(2)–A1        | 0.0229     | [0.0168; 0.0298] |
| Omitting Dyhl–Polk A 2020(2)–A2        | 0.0230     | [0.0168; 0.0299] |
| Omitting Raber I 2019                  | 0.0230     | [0.0168; 0.0298] |
| Omitting Shanmuganathan JWD 2019       | 0.0233     | [0.0172; 0.0303] |
| Omitting Lombardi P 2019               | 0.0230     | [0.0168; 0.0299] |
| Omitting Jin X 2019                    | 0.0231     | [0.0169; 0.0300] |
| Omitting Primrose JN 2019              | 0.0233     | [0.0172; 0.0303] |
| Omitting Abdel–Rahman O 2019           | 0.0232     | [0.0170; 0.0301] |
| Omitting Hayashi Y 2019                | 0.0228     | [0.0167; 0.0296] |
| Omitting Peng J 2018                   | 0.0222     | [0.0163; 0.0287] |
| Omitting Peng J 2018–A1                | 0.0222     | [0.0163; 0.0289] |
| Omitting Peng J 2018–A2                | 0.0222     | [0.0163; 0.0288] |
| Omitting Chen EY 2018                  | 0.0231     | [0.0170; 0.0300] |
| Omitting Kwakman JJM 2017              | 0.0231     | [0.0169; 0.0300] |
| Omitting Turan T 2017                  | 0.0229     | [0.0168; 0.0297] |
| Omitting Leicher LW 2017               | 0.0232     | [0.0170; 0.0301] |
| Omitting Zhang P 2017–A1               | 0.0233     | [0.0171; 0.0302] |
| Omitting Zhang P 2017–A2               | 0.0234     | [0.0173; 0.0303] |
| Omitting Kerr RS 2016–A1               | 0.0228     | [0.0167; 0.0297] |
| Omitting Kerr RS 2016–A2               | 0.0228     | [0.0167; 0.0297] |
| Omitting Lestuzzi C 2016               | 0.0228     | [0.0167; 0.0297] |
| Omitting Winther SB 2016               | 0.0234     | [0.0172; 0.0303] |
| Omitting Polk A 2016                   | 0.0231     | [0.0169; 0.0300] |
| Omitting Mayer RJ 2015                 | 0.0234     | [0.0172; 0.0303] |
| Omitting Lestuzzi C 2014               | 0.0226     | [0.0165; 0.0294] |
| Omitting Tonyali O 2013                | 0.0233     | [0.0171; 0.0302] |
| Omitting Okines AFC 2013–A1            | 0.0232     | [0.0171; 0.0301] |
| Omitting Okines AFC 2013–A2            | 0.0228     | [0.0167; 0.0297] |
| Omitting Cen P 2012                    | 0.0216     | [0.0161; 0.0277] |
| Omitting Khan MA 2012                  | 0.0230     | [0.0169; 0.0299] |
| Omitting Martin M 2012                 | 0.0232     | [0.0170; 0.0301] |
| Omitting Petrini L 2012                | 0.0233     | [0.0172; 0.0302] |
| Omitting Koca D 2011                   | 0.0228     | [0.0167; 0.0296] |
| Omitting Jensen SA 2011                | 0.0229     | [0.0168; 0.0298] |
| Omitting Wildiers H 2010–A1            | 0.0234     | [0.0172; 0.0302] |
| Omitting Wildiers H 2010–A2            | 0.0233     | [0.0172; 0.0302] |
| Omitting Torrisi R 2010                | 0.0233     | [0.0171; 0.0302] |
| Omitting Masi G 2010                   | 0.0232     | [0.0170; 0.0300] |
| Omitting Michalaki V 2010              | 0.0233     | [0.0171; 0.0302] |
| Omitting Chua YJ 2010                  | 0.0232     | [0.0170; 0.0301] |
| Omitting Baur M 2010                   | 0.0232     | [0.0170; 0.0301] |
| Omitting Hu W 2010–A1                  | 0.0230     | [0.0168; 0.0298] |
| Omitting Hu W 2010–A2                  | 0.0225     | [0.0165; 0.0292] |
| Omitting Joensuu H 2009–A1             | 0.0234     | [0.0173; 0.0303] |
| Omitting Joensuu H 2009–A2             | 0.0234     | [0.0173; 0.0303] |
| Omitting Pisano C 2009                 | 0.0233     | [0.0171; 0.0302] |
| Omitting Bathe OF 2009                 | 0.0231     | [0.0169; 0.0300] |
| Omitting Skof E 2009–A1                | 0.0231     | [0.0170; 0.0300] |
| Omitting Skof E 2009–A2                | 0.0229     | [0.0168; 0.0298] |
| Omitting Ardavanis A 2008              | 0.0233     | [0.0171; 0.0302] |
| Omitting Kosmas C 2008                 | 0.0232     | [0.0170; 0.0301] |
| Omitting Yamamoto D 2007               | 0.0234     | [0.0172; 0.0303] |
| Omitting Natoli C 2007                 | 0.0233     | [0.0172; 0.0302] |
| Omitting Neri B 2007                   | 0.0233     | [0.0171; 0.0302] |
| Omitting Machiels JP 2007              | 0.0231     | [0.0170; 0.0300] |
| Omitting Buzdar AU 2007–A1             | 0.0231     | [0.0169; 0.0299] |
| Omitting Buzdar AU 2007–A2             | 0.0233     | [0.0172; 0.0302] |
| Omitting Yilmaz U 2007                 | 0.0230     | [0.0168; 0.0298] |
| Omitting ECOG–E3205/ Garg MK 2007/2017 | 0.0234     | [0.0172; 0.0303] |
| Omitting Emmanouilides C 2006          | 0.0231     | [0.0170; 0.0300] |
| Omitting Geyer CE 2006–A1              | 0.0233     | [0.0171; 0.0302] |
| Omitting Geyer CE 2006–A2              | 0.0235     | [0.0173; 0.0304] |
| Omitting Mambrini A 2006               | 0.0233     | [0.0171; 0.0302] |
| Omitting Thatai LC 2006                | 0.0233     | [0.0172; 0.0302] |
| Omitting Koopman M 2006–A1             | 0.0232     | [0.0170; 0.0301] |
| Omitting Koopman M 2006–A2             | 0.0231     | [0.0170; 0.0301] |
| Omitting Jensen SA 2006–A1             | 0.0232     | [0.0170; 0.0301] |
| Omitting Jensen SA 2006–A2             | 0.0234     | [0.0172; 0.0303] |
| Omitting Jensen SA 2006–A3             | 0.0229     | [0.0168; 0.0298] |
| Omitting Jensen SA 2006–A4             | 0.0234     | [0.0172; 0.0302] |
| Omitting Jensen SA 2006–A5             | 0.0230     | [0.0169; 0.0298] |
| Omitting                               |            |                  |

D



## Incidence of ECG changes

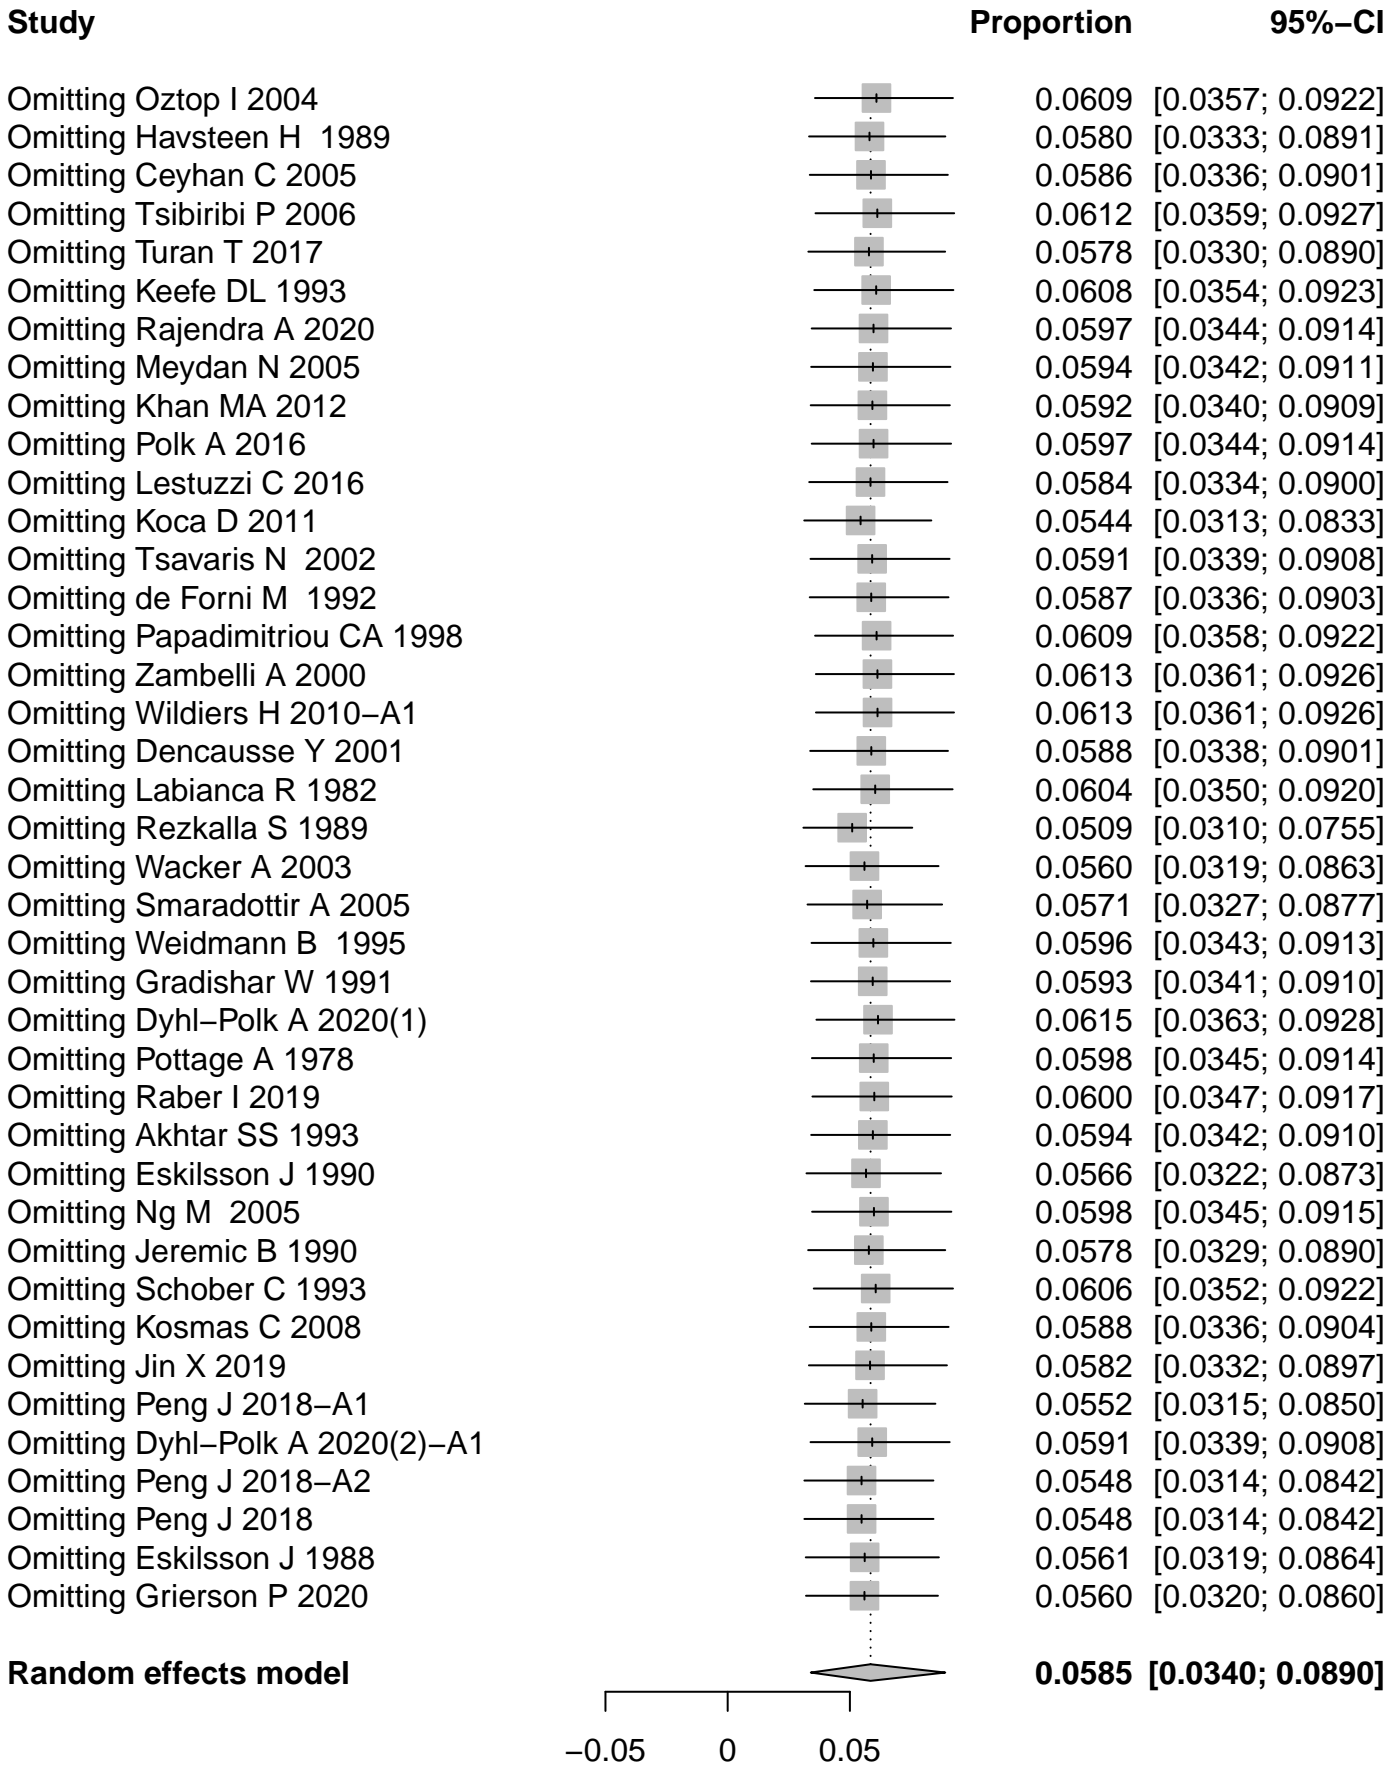

# F
