# Supplementary material
Source: MDPI journal article supplement (https://www.mdpi.com/1424-8247/16/4/510)
Supplement: s1 [file s1]

| Study                              | Events | Total | Proportion | 95%-CI           | Weight |
|------------------------------------|--------|-------|------------|------------------|--------|
| Mayer IA 2021                      | 1      | 198   | 0.0051     | [0.0001; 0.0278] | 0.9%   |
| Chakravarthy AB 2020–A1            | 1      | 176   | 0.0057     | [0.0001; 0.0312] | 0.9%   |
| Chakravarthy AB 2020–A2            | 3      | 179   | 0.0168     | [0.0035; 0.0482] | 0.9%   |
| Dyhl–Polk A 2020(1)                | 11     | 108   | 0.1019     | [0.0520; 0.1749] | 0.8%   |
| Osterlund P 2020                   | 0      | 141   | 0.0000     | [0.0000; 0.0258] | 0.8%   |
| Delaloge S 2020                    | 3      | 628   | 0.0048     | [0.0010; 0.0139] | 1.1%   |
| Dyhl–Polk A 2020(2)–A1             | 20     | 995   | 0.0201     | [0.0123; 0.0309] | 1.1%   |
| Dyhl–Polk A 2020(2)–A2             | 20     | 1241  | 0.0161     | [0.0099; 0.0248] | 1.1%   |
| Gibson MK 2019                     | 6      | 22    | 0.2727     | [0.1073; 0.5022] | 0.4%   |
| Jin X 2019                         | 12     | 129   | 0.0930     | [0.0490; 0.1569] | 0.8%   |
| Rivera F 2019                      | 1      | 45    | 0.0222     | [0.0006; 0.1177] | 0.5%   |
| Primrose JN 2019                   | 5      | 213   | 0.0235     | [0.0077; 0.0539] | 0.9%   |
| Chen EY 2018                       | 6      | 47    | 0.1277     | [0.0483; 0.2574] | 0.6%   |
| Yang H 2018–A1                     | 0      | 30    | 0.0000     | [0.0000; 0.1157] | 0.4%   |
| Yang H 2018–A2                     | 0      | 30    | 0.0000     | [0.0000; 0.1157] | 0.4%   |
| Alderson D 2017–A1                 | 2      | 446   | 0.0045     | [0.0005; 0.0161] | 1.0%   |
| Alderson D 2017–A2                 | 3      | 441   | 0.0068     | [0.0014; 0.0198] | 1.0%   |
| Kwakman JJM 2017                   | 47     | 1973  | 0.0238     | [0.0176; 0.0316] | 1.1%   |
| Harbeck N 2017                     | 7      | 102   | 0.0686     | [0.0280; 0.1363] | 0.8%   |
| Kerr RS 2016–A1                    | 33     | 973   | 0.0339     | [0.0235; 0.0473] | 1.1%   |
| Kerr RS 2016–A2                    | 27     | 968   | 0.0279     | [0.0185; 0.0403] | 1.1%   |
| Winther SB 2016                    | 2      | 71    | 0.0282     | [0.0034; 0.0981] | 0.7%   |
| Mayer RJ 2015                      | 1      | 534   | 0.0019     | [0.0000; 0.0104] | 1.1%   |
| van der Sluis PC 2015–A1           | 7      | 93    | 0.0753     | [0.0308; 0.1490] | 0.7%   |
| van der Sluis PC 2015–A2           | 0      | 38    | 0.0000     | [0.0000; 0.0925] | 0.5%   |
| Tonyali O 2013                     | 1      | 37    | 0.0270     | [0.0007; 0.1416] | 0.5%   |
| Okines AFC 2013–A1                 | 1      | 101   | 0.0099     | [0.0003; 0.0539] | 0.8%   |
| Okines AFC 2013–A2                 | 4      | 99    | 0.0404     | [0.0111; 0.1002] | 0.8%   |
| Uygun K 2013                       | 0      | 132   | 0.0000     | [0.0000; 0.0276] | 0.8%   |
| Mackey JR 2013                     | 17     | 736   | 0.0231     | [0.0135; 0.0367] | 1.1%   |
| Cetin B 2012                       | 0      | 203   | 0.0000     | [0.0000; 0.0180] | 0.9%   |
| Lang I 2012                        | 0      | 277   | 0.0000     | [0.0000; 0.0132] | 1.0%   |
| Nishimura Y 2012–A1                | 5      | 42    | 0.1190     | [0.0398; 0.2563] | 0.5%   |
| Nishimura Y 2012–A2                | 3      | 45    | 0.0667     | [0.0140; 0.1827] | 0.5%   |
| Martin M 2012                      | 2      | 88    | 0.0227     | [0.0028; 0.0797] | 0.7%   |
| Petrini L 2012                     | 3      | 39    | 0.0769     | [0.0162; 0.2087] | 0.5%   |
| Dipetrillo T 2012                  | 1      | 26    | 0.0385     | [0.0010; 0.1964] | 0.4%   |
| Greil R 2011                       | 3      | 293   | 0.0102     | [0.0021; 0.0296] | 1.0%   |
| Robert NJ 2011–A1                  | 1      | 201   | 0.0050     | [0.0001; 0.0274] | 0.9%   |
| Robert NJ 2011–A2                  | 6      | 404   | 0.0149     | [0.0055; 0.0320] | 1.0%   |
| Kato K 2010                        | 12     | 76    | 0.1579     | [0.0843; 0.2596] | 0.7%   |
| Wildiers H 2010–A1                 | 0      | 53    | 0.0000     | [0.0000; 0.0672] | 0.6%   |
| Wildiers H 2010–A2                 | 0      | 50    | 0.0000     | [0.0000; 0.0711] | 0.6%   |
| Masi G 2010                        | 2      | 57    | 0.0351     | [0.0043; 0.1211] | 0.6%   |
| Michalaki V 2010                   | 0      | 29    | 0.0000     | [0.0000; 0.1194] | 0.4%   |
| Baur M 2010                        | 1      | 71    | 0.0141     | [0.0004; 0.0760] | 0.7%   |
| Hu W 2010–A1                       | 0      | 34    | 0.0000     | [0.0000; 0.1028] | 0.5%   |
| Hu W 2010–A2                       | 1      | 37    | 0.0270     | [0.0007; 0.1416] | 0.5%   |
| Osawa S 2009                       | 2      | 33    | 0.0606     | [0.0074; 0.2023] | 0.5%   |
| Pisano C 2009                      | 2      | 36    | 0.0556     | [0.0068; 0.1866] | 0.5%   |
| Bathe OF 2009                      | 1      | 35    | 0.0286     | [0.0007; 0.1492] | 0.5%   |
| Skof E 2009–A1                     | 1      | 41    | 0.0244     | [0.0006; 0.1286] | 0.5%   |
| Skof E 2009–A2                     | 3      | 46    | 0.0652     | [0.0137; 0.1790] | 0.6%   |
| Giuliani F 2008                    | 1      | 41    | 0.0244     | [0.0006; 0.1286] | 0.5%   |
| Ardavanis A 2008                   | 1      | 34    | 0.0294     | [0.0007; 0.1533] | 0.5%   |
| Rothenberg ML 2008–A1              | 2      | 311   | 0.0064     | [0.0008; 0.0230] | 1.0%   |
| Rothenberg ML 2008–A2              | 2      | 308   | 0.0065     | [0.0008; 0.0233] | 1.0%   |
| Yamamoto D 2007                    | 0      | 59    | 0.0000     | [0.0000; 0.0606] | 0.6%   |
| Natoli C 2007                      | 0      | 44    | 0.0000     | [0.0000; 0.0804] | 0.5%   |
| Neri B 2007                        | 0      | 36    | 0.0000     | [0.0000; 0.0974] | 0.5%   |
| Machiels JP 2007                   | 1      | 40    | 0.0250     | [0.0006; 0.1316] | 0.5%   |
| Sasamoto R 2007–A1                 | 4      | 68    | 0.0588     | [0.0163; 0.1438] | 0.7%   |
| Sasamoto R 2007–A2                 | 1      | 68    | 0.0147     | [0.0004; 0.0792] | 0.7%   |
| ECOG–E3205/ Garg MK 2007/2017      | 2      | 62    | 0.0323     | [0.0039; 0.1117] | 0.6%   |
| Emmanouilides C 2006               | 2      | 53    | 0.0377     | [0.0046; 0.1298] | 0.6%   |
| Thatai LC 2006                     | 0      | 39    | 0.0000     | [0.0000; 0.0903] | 0.5%   |
| Jensen SA 2006–A1                  | 4      | 214   | 0.0187     | [0.0051; 0.0472] | 0.9%   |
| Jensen SA 2006–A2                  | 3      | 81    | 0.0370     | [0.0077; 0.1044] | 0.7%   |
| Jensen SA 2006–A3                  | 17     | 352   | 0.0483     | [0.0284; 0.0762] | 1.0%   |
| Jensen SA 2006–A4                  | 1      | 10    | 0.1000     | [0.0025; 0.4450] | 0.2%   |
| Jensen SA 2006–A5                  | 2      | 11    | 0.1818     | [0.0228; 0.5178] | 0.2%   |
| Velenik V 2006                     | 1      | 57    | 0.0175     | [0.0004; 0.0939] | 0.6%   |
| Rapidis AD 2006                    | 1      | 42    | 0.0238     | [0.0006; 0.1257] | 0.5%   |
| Klautke G 2006                     | 1      | 28    | 0.0357     | [0.0009; 0.1835] | 0.4%   |
| Giordano KF 2006                   | 7      | 44    | 0.1591     | [0.0664; 0.3007] | 0.5%   |
| Jatoi A 2006                       | 4      | 46    | 0.0870     | [0.0242; 0.2079] | 0.6%   |
| Baghi M 2006                       | 1      | 24    | 0.0417     | [0.0011; 0.2112] | 0.4%   |
| Gianni L 2005                      | 6      | 1233  | 0.0049     | [0.0018; 0.0106] | 1.1%   |
| Bontenbal M 2005                   | 6      | 107   | 0.0561     | [0.0209; 0.1181] | 0.8%   |
| Lordick F 2005                     | 1      | 48    | 0.0208     | [0.0005; 0.1107] | 0.6%   |
| Berruti A 2005                     | 1      | 61    | 0.0164     | [0.0004; 0.0880] | 0.6%   |
| Erman M 2005                       | 0      | 88    | 0.0000     | [0.0000; 0.0411] | 0.7%   |
| Berruti A 2005                     | 1      | 53    | 0.0189     | [0.0005; 0.1007] | 0.6%   |
| ECOG–E1103/ Li TH 2004/2012        | 1      | 68    | 0.0147     | [0.0004; 0.0792] | 0.7%   |
| Oztop I 2004                       | 0      | 22    | 0.0000     | [0.0000; 0.1544] | 0.4%   |
| Martin M 2003–A1                   | 0      | 505   | 0.0000     | [0.0000; 0.0073] | 1.1%   |
| Martin M 2003–A2                   | 3      | 480   | 0.0063     | [0.0013; 0.0182] | 1.0%   |
| Daniele B 2003                     | 2      | 34    | 0.0588     | [0.0072; 0.1968] | 0.5%   |
| Elomaa I 2003                      | 2      | 40    | 0.0500     | [0.0061; 0.1692] | 0.5%   |
| ECOG–E3201 2003/2018–A1            | 2      | 59    | 0.0339     | [0.0041; 0.1171] | 0.6%   |
| ECOG–E3201 2003/2018–A2            | 0      | 58    | 0.0000     | [0.0000; 0.0616] | 0.6%   |
| ECOG–E3201 2003/2018–A3            | 1      | 62    | 0.0161     | [0.0004; 0.0866] | 0.6%   |
| Hitt R 2002                        | 1      | 70    | 0.0143     | [0.0004; 0.0770] | 0.7%   |
| Vaishampayan UN 2002               | 1      | 32    | 0.0312     | [0.0008; 0.1622] | 0.4%   |
| Van Cutsem E 2002–A1               | 4      | 593   | 0.0067     | [0.0018; 0.0172] | 1.1%   |
| Van Cutsem E 2002–A2               | 5      | 596   | 0.0084     | [0.0027; 0.0195] | 1.1%   |
| Van Cutsem E 2002–A3               | 0      | 236   | 0.0000     | [0.0000; 0.0155] | 1.0%   |
| ECOG–E3200/ Giantonio BJ 2001/2007 | 22     | 808   | 0.0272     | [0.0171; 0.0409] | 1.1%   |
| Hartung G 2001                     | 2      | 51    | 0.0392     | [0.0048; 0.1346] | 0.6%   |
| Dencausse Y 2001                   | 1      | 21    | 0.0476     | [0.0012; 0.2382] | 0.3%   |
| Recchia F 2001                     | 0      | 28    | 0.0000     | [0.0000; 0.1234] | 0.4%   |
| Riccardi A 2001                    | 1      | 69    | 0.0145     | [0.0004; 0.0781] | 0.7%   |
| Piccart MJ 2001                    | 0      | 255   | 0.0000     | [0.0000; 0.0144] | 1.0%   |
| Peiffert D 2001                    | 2      | 80    | 0.0250     | [0.0030; 0.0874] | 0.7%   |
| Pienkowski T 2001                  | 3      | 65    | 0.0462     | [0.0096; 0.1290] | 0.6%   |
| Blum JL 2001                       | 0      | 74    | 0.0000     | [0.0000; 0.0486] | 0.7%   |
| Hoff PM 2001–A1                    | 2      | 302   | 0.0066     | [0.0008; 0.0237] | 1.0%   |
| Hoff PM 2001–A2                    | 3      | 303   | 0.0099     | [0.0020; 0.0287] | 1.0%   |
| Lin JK 2000                        | 0      | 40    | 0.0000     | [0.0000; 0.0881] | 0.5%   |
| Zambelli A 2000                    | 0      | 48    | 0.0000     | [0.0000; 0.0740] | 0.6%   |
| Balloni L 2000                     | 0      | 25    | 0.0000     | [0.0000; 0.1372] | 0.4%   |
| Susvnjar S 1999                    | 0      | 19    | 0.0000     | [0.0000; 0.1765] | 0.3%   |
| Valero V 1999                      | 1      | 41    | 0.0244     | [0.0006; 0.1286] | 0.5%   |
| Hasbini A 1999                     | 1      | 44    | 0.0227     | [0.0006; 0.1202] | 0.5%   |
| Blum JL 1999                       | 0      | 162   | 0.0000     | [0.0000; 0.0225] | 0.9%   |
| Blajman C 1999                     | 0      | 85    | 0.0000     | [0.0000; 0.0425] | 0.7%   |
| Birkenhake S 1999                  | 0      | 25    | 0.0000     | [0.0000; 0.1372] | 0.4%   |
| Milano G 1999                      | 1      | 19    | 0.0526     | [0.0013; 0.2603] | 0.3%   |
| Mantovani G 1998–A1                | 1      | 16    | 0.0625     | [0.0016; 0.3023] | 0.3%   |
| Mantovani G 1998–A2                | 0      | 17    | 0.0000     | [0.0000; 0.1951] | 0.3%   |
| Papadimitriou CA 1998              | 1      | 24    | 0.0417     | [0.0011; 0.2112] | 0.4%   |
| Fetting JH 1998–A1                 | 1      | 307   | 0.0033     | [0.0001; 0.0180] | 1.0%   |
| Fetting JH 1998–A2                 | 5      | 309   | 0.0162     | [0.0053; 0.0374] | 1.0%   |
| Seitz JF 1998                      | 0      | 24    | 0.0000     | [0.0000; 0.1425] | 0.4%   |
| Wang WS 1998                       | 1      | 41    | 0.0244     | [0.0006; 0.1286] | 0.5%   |
| Taylor SG 1997                     | 1      | 78    | 0.0128     | [0.0003; 0.0694] | 0.7%   |
| Yen CC 1997                        | 4      | 13    | 0.3077     | [0.0909; 0.6143] | 0.2%   |
| Kroning KC 1997                    | 0      | 27    | 0.0000     | [0.0000; 0.1277] | 0.4%   |
| Ychou M 1996                       | 1      | 28    | 0.0357     | [0.0009; 0.1835] | 0.4%   |
| Kok TC 1996                        | 0      | 29    | 0.0000     | [0.0000; 0.1194] | 0.4%   |
| Gebbia V 1996                      | 0      | 33    | 0.0000     | [0.0000; 0.1058] | 0.5%   |
| Hainsworth JD 1996                 | 2      | 46    | 0.0435     | [0.0053; 0.1484] | 0.6%   |
| Colozza M 1996                     | 0      | 28    | 0.0000     | [0.0000; 0.1234] | 0.4%   |
| Mammoliti S 1996                   | 1      | 24    | 0.0417     | [0.0011; 0.2112] | 0.4%   |
| Becuarn YH 1996                    | 3      | 86    | 0.0349     | [0.0073; 0.0986] | 0.7%   |
| Macdonald JS 1995                  | 1      | 90    | 0.0111     | [0.0003; 0.0604] | 0.7%   |
| Leonardi V 1995                    | 2      | 34    | 0.0588     | [0.0072; 0.1968] | 0.5%   |
| Carmo–Pereira J 1995               | 0      | 38    | 0.0000     | [0.0000; 0.0925] | 0.5%   |
| Haas NB 1995                       | 2      | 38    | 0.0526     | [0.0064; 0.1775] | 0.5%   |
| Klastersky J 1994                  | 20     | 182   | 0.1099     | [0.0684; 0.1646] | 0.9%   |
| Morere JF 1994                     | 0      | 109   | 0.0000     | [0.0000; 0.0333] | 0.8%   |
| Langer CJ 1993                     | 2      | 40    | 0.0500     | [0.0061; 0.1692] | 0.5%   |
| Carmo–Pereira J 1993               | 0      | 36    | 0.0000     | [0.0000; 0.0974] | 0.5%   |
| Neri B 1993                        | 2      | 35    | 0.0571     | [0.0070; 0.1916] | 0.5%   |
| Jassem J 1993                      | 7      | 189   | 0.0370     | [0.0150; 0.0748] | 0.9%   |
| Keefe DL 1993                      | 5      | 910   | 0.0055     | [0.0018; 0.0128] | 1.1%   |
| Kuzel TM 1993                      | 2      | 22    | 0.0909     | [0.0112; 0.2916] | 0.4%   |
| Citron ML 1992                     | 3      | 86    | 0.0349     | [0.0073; 0.0986] | 0.7%   |
| Perit P 1991–A1                    | 0      | 31    | 0.0000     | [0.0000; 0.1122] | 0.4%   |
| Perit P 1991–A2                    | 0      | 29    | 0.0000     | [0.0000; 0.1194] | 0.4%   |
| Zamagni C 1991                     | 0      | 30    | 0.0000     | [0.0000; 0.1157] | 0.4%   |
| Samonigg H 1990                    | 0      | 21    | 0.0000     | [0.0000; 0.1611] | 0.3%   |

Random effects model  
Heterogeneity:  $I^2 = 70\%$ ,  $\tau^2 = 0.0049$ ,  $p < 0.01$

0 0.1 0.2 0.3 0.4 0.5 0.6
