# Supplementary material
Source: MDPI journal article supplement (https://www.mdpi.com/1424-8247/16/4/510)
Supplement: s1 [file s1]

**Table S1** The retrieval scheme used for each database <sup>a,b</sup>

| <b>PubMed</b>  |                                                                                                                                                                                                                                                                                                                                                                                                                                                                                                                                                                                                                                                                                                                                                                                                                                                                                                                                                                                                                                                                                                                                                                                                                                                                                                                                                                                                                                                                    |
|----------------|--------------------------------------------------------------------------------------------------------------------------------------------------------------------------------------------------------------------------------------------------------------------------------------------------------------------------------------------------------------------------------------------------------------------------------------------------------------------------------------------------------------------------------------------------------------------------------------------------------------------------------------------------------------------------------------------------------------------------------------------------------------------------------------------------------------------------------------------------------------------------------------------------------------------------------------------------------------------------------------------------------------------------------------------------------------------------------------------------------------------------------------------------------------------------------------------------------------------------------------------------------------------------------------------------------------------------------------------------------------------------------------------------------------------------------------------------------------------|
| <b>#1</b>      | heart[Title/Abstract] OR cardiac[Title/Abstract] OR cardiovascular[Title/Abstract] OR cardiotoxicity[Title/Abstract]                                                                                                                                                                                                                                                                                                                                                                                                                                                                                                                                                                                                                                                                                                                                                                                                                                                                                                                                                                                                                                                                                                                                                                                                                                                                                                                                               |
| <b>#2</b>      | myocardial infarction[Title/Abstract] OR ischemia[Title/Abstract] OR coronary artery[Title/Abstract] OR acute coronary syndrome[Title/Abstract] OR coronary vasospasm[Title/Abstract] OR chest pain[Title/Abstract] OR angina[Title/Abstract] OR syncope[Title/Abstract] OR dyspnea[Title/Abstract] OR myocardium[Title/Abstract] OR palpitation[Title/Abstract] OR ventricular dysfunction[Title/Abstract] OR systolic dysfunction[Title/Abstract] OR heart failure[Title/Abstract] OR LVEF[Title/Abstract] OR atrioventricular block[Title/Abstract] OR conduction disorder[Title/Abstract] OR bundle branch block[Title/Abstract] OR arrhythmia[Title/Abstract] OR tachycardia[Title/Abstract] OR bradycardia[Title/Abstract] OR atrial fibrillation[Title/Abstract] OR ventricular fibrillation[Title/Abstract] OR repolarization[Title/Abstract] OR atrial flutter[Title/Abstract] OR ECG[Title/Abstract] OR pericardial effusion[Title/Abstract] OR pericarditis[Title/Abstract] OR pericardial tamponade[Title/Abstract] OR cardiac myositis[Title/Abstract] OR myocarditis[Title/Abstract] OR cardiomyopathy[Title/Abstract] OR heart-sac[Title/Abstract] OR cardiac arrest[Title/Abstract] OR sudden death[Title/Abstract] OR cardiogenic shock[Title/Abstract] OR regurgitation[Title/Abstract] OR echocardiography[Title/Abstract] OR cardiac biomarkers[Title/Abstract] OR troponin[Title/Abstract] OR enzyme[Title/Abstract] OR death[Title/Abstract] |
| <b>#3</b>      | #1 OR #2                                                                                                                                                                                                                                                                                                                                                                                                                                                                                                                                                                                                                                                                                                                                                                                                                                                                                                                                                                                                                                                                                                                                                                                                                                                                                                                                                                                                                                                           |
| <b>#4</b>      | fluoropyridine[Title/Abstract] OR fluoropyrimidine[Title/Abstract] OR 5-fluorouracil[Title/Abstract] OR 5-FU[Title/Abstract] OR fluorouracil[Title/Abstract] OR capecitabine[Title/Abstract] OR xeloda[Title/Abstract] OR tegafur[Title/Abstract] OR S-1[Title/Abstract] OR teysuno[Title/Abstract] OR UFT[Title/Abstract] OR carmofur[Title/Abstract] OR TAS-102[Title/Abstract] OR lonsurf[Title/Abstract] OR FTD/TPI[Title/Abstract] OR trifluridine[Title/Abstract] OR tipiracil[Title/Abstract]                                                                                                                                                                                                                                                                                                                                                                                                                                                                                                                                                                                                                                                                                                                                                                                                                                                                                                                                                               |
| <b>#5</b>      | #3 AND #4                                                                                                                                                                                                                                                                                                                                                                                                                                                                                                                                                                                                                                                                                                                                                                                                                                                                                                                                                                                                                                                                                                                                                                                                                                                                                                                                                                                                                                                          |
| <b>Medline</b> |                                                                                                                                                                                                                                                                                                                                                                                                                                                                                                                                                                                                                                                                                                                                                                                                                                                                                                                                                                                                                                                                                                                                                                                                                                                                                                                                                                                                                                                                    |
| <b>#1</b>      | (heart or cardiac or cardiovascular or cardiotoxicity).ab.                                                                                                                                                                                                                                                                                                                                                                                                                                                                                                                                                                                                                                                                                                                                                                                                                                                                                                                                                                                                                                                                                                                                                                                                                                                                                                                                                                                                         |
| <b>#2</b>      | (myocardial infarction or ischemia or coronary artery or acute coronary syndrome or coronary vasospasm or chest pain or angina or syncope or dyspnea or myocardium or palpitation or ventricular dysfunction or systolic dysfunction or heart failure or LVEF or atrioventricular block or conduction disorder or bundle branch block or arrhythmia or tachycardia or bradycardia or atrial fibrillation or ventricular fibrillation or repolarization or atrial flutter or ECG or pericardial effusion or pericarditis or                                                                                                                                                                                                                                                                                                                                                                                                                                                                                                                                                                                                                                                                                                                                                                                                                                                                                                                                         |

|           |                                                                                                                                                                                                                                               |
|-----------|-----------------------------------------------------------------------------------------------------------------------------------------------------------------------------------------------------------------------------------------------|
|           | pericardial tamponade or cardiac myositis or myocarditis or cardiomyopathy or heart-sac or cardiac arrest or sudden death or cardiogenic shock or regurgitation or echocardiography or cardiac biomarkers or troponin or enzyme or death).ab. |
| <b>#3</b> | #1 or #2                                                                                                                                                                                                                                      |
| <b>#4</b> | (fluoropyridine or fluoropyrimidine or 5-fluorouracil or 5-FU or fluorouracil or capecitabine or xeloda or tegafur or S-1 or teysuno or UFT or carmofur or TAS-102 or lonsurf or FTD TPI or trifluridine or tipiracil).ab.                    |
| <b>#5</b> | #3 and #4                                                                                                                                                                                                                                     |

---

### Embase

---

|           |                                                                                                                                                                                                                                                                                                                                                                                                                                                                                                                                                                                                                                                                                                                                                                                                                                                                                                                                                                                                                                                                                                               |
|-----------|---------------------------------------------------------------------------------------------------------------------------------------------------------------------------------------------------------------------------------------------------------------------------------------------------------------------------------------------------------------------------------------------------------------------------------------------------------------------------------------------------------------------------------------------------------------------------------------------------------------------------------------------------------------------------------------------------------------------------------------------------------------------------------------------------------------------------------------------------------------------------------------------------------------------------------------------------------------------------------------------------------------------------------------------------------------------------------------------------------------|
| <b>#1</b> | heart:ab OR cardiac:ab OR cardiovascular:ab OR cardiotoxicity:ab                                                                                                                                                                                                                                                                                                                                                                                                                                                                                                                                                                                                                                                                                                                                                                                                                                                                                                                                                                                                                                              |
| <b>#2</b> | ((((((((((((((((((myocardial:ab AND infarction:ab OR ischemia:ab OR coronary:ab) AND artery:ab OR acute:ab) AND coronary:ab AND syndrome:ab OR coronary:ab) AND vasospasm:ab OR chest:ab) AND pain:ab OR angina:ab OR syncope:ab OR dyspnea:ab OR myocardiumor:ab) AND palpitation:ab OR ventricular:ab) AND dysfunction:ab OR systolic:ab) AND dysfunction:ab OR heart:ab) AND failure:ab OR lvef:ab OR atrioventricular:ab) AND block:ab OR conduction:ab) AND disorder:ab OR bundle:ab) AND branch:ab AND block:ab OR arrhythmia:ab OR tachycardia:ab OR bradycardia:ab OR atrial:ab) AND fibrillation:ab OR ventricular:ab) AND fibrillation:ab OR repolarization:ab OR atrial:ab) AND flutter:ab OR ecg:ab OR pericardial:ab) AND effusion:ab OR pericarditis:ab OR pericardial:ab) AND tamponade:ab OR cardiac:ab) AND myositis:ab OR myocarditis:ab OR cardiomyopathy:ab OR 'heart sac':ab OR cardiac:ab) AND arrest:ab OR sudden:ab) AND death:ab OR cardiogenic:ab) AND shock:ab OR regurgitation:ab OR echocardiography:ab OR cardiac:ab) AND biomarkers:ab OR troponin:ab OR enzyme:ab OR death:ab |
| <b>#3</b> | #1 OR #2                                                                                                                                                                                                                                                                                                                                                                                                                                                                                                                                                                                                                                                                                                                                                                                                                                                                                                                                                                                                                                                                                                      |
| <b>#4</b> | fluoropyridine:ab OR fluoropyrimidine:ab OR '5 fluorouracil':ab OR '5 fu':ab OR fluorouracil:ab OR capecitabine:ab OR xeloda:ab OR tegafur:ab OR 's 1':ab OR teysuno:ab OR uft:ab OR carmofur:ab OR 'tas 102':ab OR lonsurf:ab OR ftd:ab OR tpi:ab OR trifluridine:ab OR tipiracil:ab                                                                                                                                                                                                                                                                                                                                                                                                                                                                                                                                                                                                                                                                                                                                                                                                                         |
| <b>#5</b> | #3 AND #4                                                                                                                                                                                                                                                                                                                                                                                                                                                                                                                                                                                                                                                                                                                                                                                                                                                                                                                                                                                                                                                                                                     |

---

### Web of Science

---

|           |                                                                                                                                                                                                                                                                                                                                                                                                                                           |
|-----------|-------------------------------------------------------------------------------------------------------------------------------------------------------------------------------------------------------------------------------------------------------------------------------------------------------------------------------------------------------------------------------------------------------------------------------------------|
| <b>#1</b> | AB=(heart or cardiac or cardiovascular or cardiotoxicity)                                                                                                                                                                                                                                                                                                                                                                                 |
| <b>#2</b> | AB=(myocardial infarction or ischemia or coronary artery or acute coronary syndrome or coronary vasospasm or chest pain or angina or syncope or dyspnea or myocardiumor palpitation or ventricular dysfunction or systolic dysfunction or heart failure or LVEF or atrioventricular block or conduction disorder or bundle branch block or arrhythmia or tachycardia or bradycardia or atrial fibrillation or ventricular fibrillation or |

---

---

|           |                                                                                                                                                                                                                                                                                                                              |
|-----------|------------------------------------------------------------------------------------------------------------------------------------------------------------------------------------------------------------------------------------------------------------------------------------------------------------------------------|
|           | repolarization or atrial flutter or ECG or pericardial effusion or pericarditis or pericardial tamponade or cardiac myositis or myocarditis or cardiomyopathy or heart-sac or cardiac arrest or sudden death or cardiogenic shock or regurgitation or echocardiography or cardiac biomarkers or troponin or enzyme or death) |
| <b>#3</b> | (#1) OR #2                                                                                                                                                                                                                                                                                                                   |
| <b>#4</b> | AB=(fluoropyridine or fluoropyrimidine or 5-fluorouracil or 5-FU or fluorouracil or capecitabine or xeloda or tegafur or S-1 or teysuno or UFT or carmofur or TAS-102 or lonsurf or FTD TPI or trifluridine or tipiracil)                                                                                                    |
| <b>#5</b> | (#3) AND #4                                                                                                                                                                                                                                                                                                                  |

---



---

### Cochrane database

---

|           |                                                                                                                                                                                                                                                                                                                                                                                                                                                                                                                                                                                                                                                                                                                                                                         |
|-----------|-------------------------------------------------------------------------------------------------------------------------------------------------------------------------------------------------------------------------------------------------------------------------------------------------------------------------------------------------------------------------------------------------------------------------------------------------------------------------------------------------------------------------------------------------------------------------------------------------------------------------------------------------------------------------------------------------------------------------------------------------------------------------|
| <b>#1</b> | (heart or cardiac or cardiovascular or cardiotoxicity):ab                                                                                                                                                                                                                                                                                                                                                                                                                                                                                                                                                                                                                                                                                                               |
| <b>#2</b> | (myocardial infarction or ischemia or coronary artery or acute coronary syndrome or coronary vasospasm or chest pain or angina or syncope or dyspnea or myocardium or palpitation or ventricular dysfunction or systolic dysfunction or heart failure or LVEF or atrioventricular block or conduction disorder or bundle branch block or arrhythmia or tachycardia or bradycardia or atrial fibrillation or ventricular fibrillation or repolarization or atrial flutter or ECG or pericardial effusion or pericarditis or pericardial tamponade or cardiac myositis or myocarditis or cardiomyopathy or heart-sac or cardiac arrest or sudden death or cardiogenic shock or regurgitation or echocardiography or cardiac biomarkers or troponin or enzyme or death):ab |
| <b>#3</b> | #1 OR #2                                                                                                                                                                                                                                                                                                                                                                                                                                                                                                                                                                                                                                                                                                                                                                |
| <b>#4</b> | (fluoropyridine or fluoropyrimidine or fluorouracil or capecitabine or xeloda or tegafur or S-1 or teysuno or UFT or carmofur or TAS-102 or lonsurf or FTD TPI or trifluridine or tipiracil):ab                                                                                                                                                                                                                                                                                                                                                                                                                                                                                                                                                                         |
| <b>#5</b> | #3 AND #4                                                                                                                                                                                                                                                                                                                                                                                                                                                                                                                                                                                                                                                                                                                                                               |

---



---

### Clinical trials (<https://clinicaltrials.gov/>)

---

- fluoropyrimidine
  - 5-FU OR 5-fluorouracil OR fluorouracil
  - capecitabine
  - tegafur
  - S-1
  - TAS-102 OR FTD/TPI OR lonsurf
- 

Notes: a, The search algorithms used in this study are presented below. All databases were searched from their inception until 31 March 2021; b, Searching strategy combined two sorts of terms using the logic operator “AND”: (1) fluoropyrimidine agents, including 5-FU, capecitabine, S-1, and tipiracil hydrochloride (TAS-102); (2) treatment-related cardiac toxicities, including myocardial ischemia, acute coronary syndrome, arrhythmia, angina, heart failure, ECG changes, and so on.

**Table S2** The National Institutes of Health (NIH) quality assessment tools

**Website:** <https://www.nhlbi.nih.gov/health-topics/study-quality-assessment-tools>

| <b>1. The National Institutes of Health (NIH) quality assessment tool for case-series study</b>                            |                 |             |             |                |              |  |
|----------------------------------------------------------------------------------------------------------------------------|-----------------|-------------|-------------|----------------|--------------|--|
| <b>Major Components</b>                                                                                                    | <b>Response</b> |             |             | <b>Options</b> |              |  |
| 1. Was the study question or objective clearly stated?                                                                     | Yes             | No          | Cannot      | Determine/     | Not          |  |
|                                                                                                                            |                 |             |             | Applicable/    | Not Reported |  |
| 2. Was the study population clearly and fully described, including a case definition?                                      | Yes             | No          | Cannot      | Determine/     | Not          |  |
|                                                                                                                            |                 |             |             | Applicable/    | Not Reported |  |
| 3. Were the cases consecutive?                                                                                             | Yes             | No          | Cannot      | Determine/     | Not          |  |
|                                                                                                                            |                 |             |             | Applicable/    | Not Reported |  |
| 4. Were the subjects comparable?                                                                                           | Yes             | No          | Cannot      | Determine/     | Not          |  |
|                                                                                                                            |                 |             |             | Applicable/    | Not Reported |  |
| 5. Was the intervention clearly described?                                                                                 | Yes             | No          | Cannot      | Determine/     | Not          |  |
|                                                                                                                            |                 |             |             | Applicable/    | Not Reported |  |
| 6. Were the outcome measures clearly defined, valid, reliable, and implemented consistently across all study participants? | Yes             | No          | Cannot      | Determine/     | Not          |  |
|                                                                                                                            |                 |             |             | Applicable/    | Not Reported |  |
| 7. Was the length of follow-up adequate?                                                                                   | Yes             | No          | Cannot      | Determine/     | Not          |  |
|                                                                                                                            |                 |             |             | Applicable/    | Not Reported |  |
| 8. Were the statistical methods well-described?                                                                            | Yes             | No          | Cannot      | Determine/     | Not          |  |
|                                                                                                                            |                 |             |             | Applicable/    | Not Reported |  |
| 9. Were the results well-described?                                                                                        | Yes             | No          | Cannot      | Determine/     | Not          |  |
|                                                                                                                            |                 |             |             | Applicable/    | Not Reported |  |
| <b>Quality Rating</b>                                                                                                      | <b>Good</b>     | <b>Fair</b> | <b>Poor</b> |                |              |  |
| Additional Comments (If Poor, please state why):                                                                           |                 |             |             |                |              |  |

  

| <b>2. The National Institutes of Health (NIH) quality assessment tool of controlled intervention study</b> |                         |
|------------------------------------------------------------------------------------------------------------|-------------------------|
| <b>Major Components</b>                                                                                    | <b>Response options</b> |

|                                                                                                                                                                      |     |    |                                                      |
|----------------------------------------------------------------------------------------------------------------------------------------------------------------------|-----|----|------------------------------------------------------|
| 1. Was the study described as randomized, a randomized trial, a randomized clinical trial, or an RCT?                                                                | Yes | No | Cannot Determine/<br>Not Applicable/<br>Not Reported |
| 2. Was the method of randomization adequate (i.e., use of randomly generated assignment)?                                                                            | Yes | No | Cannot Determine/<br>Not Applicable/<br>Not Reported |
| 3. Was the treatment allocation concealed (so that assignments could not be predicted)?                                                                              | Yes | No | Cannot Determine/<br>Not Applicable/<br>Not Reported |
| 4. Were study participants and providers blinded to treatment group assignment?                                                                                      | Yes | No | Cannot Determine/<br>Not Applicable/<br>Not Reported |
| 5. Were the people assessing the outcomes blinded to the participants' group assignments?                                                                            | Yes | No | Cannot Determine/<br>Not Applicable/<br>Not Reported |
| 6. Were the groups similar at baseline on important characteristics that could affect outcomes (e.g., demographics, risk factors, co-morbid conditions)?             | Yes | No | Cannot Determine/<br>Not Applicable/<br>Not Reported |
| 7. Was the overall drop-out rate from the study at endpoint 20% or lower of the number allocated to treatment?                                                       | Yes | No | Cannot Determine/<br>Not Applicable/<br>Not Reported |
| 8. Was the differential drop-out rate (between treatment groups) at endpoint 15 percentage points or lower?                                                          | Yes | No | Cannot Determine/<br>Not Applicable/<br>Not Reported |
| 9. Was there high adherence to the intervention protocols for each treatment group?                                                                                  | Yes | No | Cannot Determine/<br>Not Applicable/<br>Not Reported |
| 10. Were other interventions avoided or similar in the groups (e.g., similar background treatments)?                                                                 | Yes | No | Cannot Determine/<br>Not Applicable/<br>Not Reported |
| 11. Were outcomes assessed using valid and reliable measures, implemented consistently across all study participants?                                                | Yes | No | Cannot Determine/<br>Not Applicable/<br>Not Reported |
| 12. Did the authors report that the sample size was sufficiently large to be able to detect a difference in the main outcome between groups with at least 80% power? | Yes | No | Cannot Determine/<br>Not Applicable/<br>Not Reported |
| 13. Were outcomes reported or subgroups analyzed prespecified (i.e., identified before analyses were conducted)?                                                     | Yes | No | Cannot Determine/<br>Not Applicable/<br>Not Reported |
| 14. Were all randomized participants analyzed in the group to which they were originally assigned, i.e., did they use an intention-to-treat analysis?                | Yes | No | Cannot Determine/<br>Not Applicable/<br>Not Reported |

---

---

**Quality Rating****Good   Fair   Poor****Additional Comments (If Poor, please state why):**

---

**Table S3** List of the included 211 studies

| No. | Author              | Year | Country/Region | Size         | Age                                  | Gender<br>(female ×<br>100%) | Tumor type                                  | Regimen                                                                                                      | Quality |
|-----|---------------------|------|----------------|--------------|--------------------------------------|------------------------------|---------------------------------------------|--------------------------------------------------------------------------------------------------------------|---------|
| 1   | Kachnic<br>LA       | 2022 | USA            | 52           | 58(34-82)                            | 0.808                        | Annal cancer                                | 5-FU/mitomycin-C+ RT                                                                                         | Fair    |
| 2   | Yamaguchi<br>K      | 2022 | Japan          | 54<br>46     | 66(32-75)<br>65(30-75)               | 0.204<br>0.391               | Gastric/gastroesophageal<br>junction cancer | SOX+ Pembrolizumab<br>SP                                                                                     | Good    |
| 3   | Conroy T            | 2021 | France         | 163          | 61(53-66)                            | 0.35                         | Rectal cancer                               | FOLFIRINOX+ RT                                                                                               | Good    |
| 4   | Hofheinz<br>RD      | 2021 | Germany        | 56           | 62(32-86)                            | 0.268                        | Esophagogastric<br>adenocarcinoma           | FLOT+ Tra                                                                                                    | Fair    |
| 5   | Meyerhardt<br>JA    | 2021 | USA            | 1261<br>1263 | 61(19.3-86.5)<br>61.7(21.8-<br>88.7) | 0.445<br>0.454               | Colon cancer                                | FOLFOX<br>FOLFOX+ Celecoxib                                                                                  | Good    |
| 6   | Mayer IA            | 2021 | USA            | 198          | 52(26-76)                            | 1                            | Breast cancer                               | Cap                                                                                                          | Good    |
| 7   | Chakravart<br>hy AB | 2020 | USA            | 176<br>179   | 54.3±11.7<br>53.9±9.9                | 0.348<br>0.376               | Rectal cancer                               | mFOLFOX<br>mFOLFOX+Bev                                                                                       | Fair    |
| 8   | Dyhl-Polk<br>A      | 2020 | Denmark        | 108          | 66(35-81)                            | 0.454                        | Colorectal or anal cancer                   | Colorectal cancer: 5-Fu or<br>FOLFOX;<br>Metastatic: FOLFOX or<br>FOLFIRI± Cet or Pan<br>Anal cancer: FP+ RT | Fair    |
| 9   | Aimar G             | 2020 | Italy          | 135          | 66                                   | 0.393                        | Colorectal cancer                           | Fluoropyrimidine                                                                                             | Good    |
| 10  | Osterlund P         | 2020 | Multi-country: | 141          | NA                                   | NA                           | Mixed malignancies <sup>a</sup>             | S1                                                                                                           | Fair    |

|    |                           |      |                                                                                                     |             |                        |                |                              |                               |                 |
|----|---------------------------|------|-----------------------------------------------------------------------------------------------------|-------------|------------------------|----------------|------------------------------|-------------------------------|-----------------|
|    |                           |      | Finland;<br>Netherland;<br>Denmark;<br>Sweden; Ireland;<br>Norway                                   |             |                        |                |                              |                               |                 |
| 11 | Rajendra A                | 2020 | Indian                                                                                              | 246         | NA                     | NA             | Head and neck cancer         | TPF                           | Fair            |
| 12 | Delaloge S                | 2020 | Multi-country:<br>France;<br>Netherlands;<br>Belgium; Spain;<br>USA; Italy;<br>Germany;<br>Portugal | 628         | 18-70                  | 1              | Breast cancer                | TX                            | Good            |
| 13 | Grierson P                | 2020 | USA                                                                                                 | 16          | 66(42-73)              | 0.563          | Pancreatic<br>adenocarcinoma | ductal Cap+ Tosedostat        | Fair            |
| 14 | Dyhl-Polk<br>A            | 2020 | Denmark                                                                                             | 995<br>1241 | 65(21-85)<br>70(22-93) | 0.447<br>0.471 | Colorectal cancer            | 5-FU based<br>Cap based       | Good            |
| 15 | Gibson MK                 | 2019 | USA                                                                                                 | 22          | 62(45-79)              | 0.091          | Esophagus adenocarcinoma     | Oxaliplatin/<br>RT            | 5-Fu+ Cet+ Fair |
| 16 | Raber I                   | 2019 | USA                                                                                                 | 177         | 54-77                  | 0.452          | Mixed malignancies           | 5-FU or Cap based             | Fair            |
| 17 | Shanmuga<br>nathan<br>JWD | 2019 | Denmark                                                                                             | 9012        | NA                     | NA             | Mixed malignancies           | 5-FU                          | Fair            |
| 18 | Lombardi P                | 2019 | Italy                                                                                               | 101         | NA                     | 0.346          | Colorectal cancer            | Fluoropyrimidine <sup>b</sup> | Good            |
| 19 | Jin X                     | 2019 | China                                                                                               | 129         | >18                    | 0.217          | Gastric cancer               | 5-FU or Cape or S-1<br>based  | Fair            |



|    |                |      |                                                                 |            |                        |                |                                                     |                                     |      |
|----|----------------|------|-----------------------------------------------------------------|------------|------------------------|----------------|-----------------------------------------------------|-------------------------------------|------|
| 20 | Rivera F       | 2019 | Spain                                                           | 45         | 65(45-80)              | 0.177          | Gastric or gastro-oesophageal junction (egj) cancer | XELOX+ Tra                          | Fair |
| 21 | Primrose JN    | 2019 | UK                                                              | 213        | 62(55-68)              | 0.5            | Biliary tract cancer                                | Cap                                 | Good |
| 22 | Abdel-Rahman O | 2019 | Canada                                                          | 3223       | 60.7(11.4)             | 0.403          | Colorectal cancer                                   | FOLFOX or Flu based+ Bev and/or Pan | Good |
| 23 | Hayashi Y      | 2019 | Japan                                                           | 80         | 66.5(62-73)            | 0.113          | Esophageal cancer                                   | 5-FU/ cisplatin+ RT                 | Fair |
| 24 | Peng J         | 2018 | China                                                           | 527        | 57(23-87)              | 0.339          | Mixed malignancies                                  | 5-FU or Cap based                   | Good |
| 25 | Chen EY        | 2018 | China                                                           | 47         | 59.7(21.4-80.1)        | 0.276          | Colorectal cancer                                   | FOLFIRI+ Celecoxib                  | Good |
| 26 | Yang H         | 2018 | China                                                           | 30<br>30   | 20-80                  | NA             | Gastric cancer (liver metastasis)                   | SOX+ Endostar<br>SOX                | Fair |
| 27 | Alderson D     | 2017 | UK                                                              | 446<br>441 | 62(57-67)<br>62(56-67) | 0.108<br>0.086 | Esophageal adenocarcinoma                           | FP<br>ECX                           | Good |
| 28 | Kwakman JJM    | 2017 | Netherlands                                                     | 1973       | NA                     | NA             | Colorectal cancer                                   | Cap mono or based +/- Bev           | Good |
| 29 | Turan T        | 2017 | turkey                                                          | 32         | 57                     | 0.303          | Mixed malignancies                                  | 5-FU based                          | Good |
| 30 | Leicher LW     | 2017 | Netherland                                                      | 86         | 69(45-83)              | 0.523          | Colorectal cancer                                   | Cap                                 | Fair |
| 31 | Zhang P        | 2017 | China                                                           | 267<br>130 | 25-70                  | 1              | Breast cancer                                       | Cap+ Utidelone<br>Cap               | Good |
| 32 | Harbeck N      | 2017 | Germany                                                         | 102        | 63(22-85)              | 1              | Breast cancer                                       | Cap                                 | Good |
| 33 | Kerr RS        | 2016 | Multi-country: Australia, Austria, Czech Republic, New Zealand, | 973<br>968 | 65(58-71)              | 0.4270.42<br>9 | Colorectal cancer                                   | Cap+Bev<br>Cap                      | Good |

|    |                  |      |                                                                                                |            |                            |                |                                                                |                             |      |
|----|------------------|------|------------------------------------------------------------------------------------------------|------------|----------------------------|----------------|----------------------------------------------------------------|-----------------------------|------|
|    |                  |      | Serbia, Slovenia,<br>UK                                                                        |            |                            |                |                                                                |                             |      |
| 34 | Lestuzzi C       | 2016 | Italy                                                                                          | 192        | 62(37-85)                  | 0.401          | Mixed malignancies                                             | Cap based                   | Fair |
| 35 | Winther SB       | 2016 | Norway                                                                                         | 71         | 67-87                      | 0.408          | Colorectal cancer                                              | SOX or S-1                  | Fair |
| 36 | Polk A           | 2016 | Denmark                                                                                        | 452        | 63(28-88)                  | 1              | Breast cancer                                                  | Cap+ Tra                    | Fair |
| 37 | Mayer RJ         | 2015 | USA                                                                                            | 534        | 63(27-82)                  | 0.389          | Colorectal cancer                                              | TAS102                      | Good |
| 38 | van der Sluis PC | 2015 | Netherlands                                                                                    | 93<br>38   | 63(36-78)                  | 0.14           | Esophageal or gastro-<br>esophageal junction<br>adenocarcinoma | ECX<br>ECX                  | Fair |
| 39 | Lestuzzi C       | 2014 | Germany                                                                                        | 358        | 57.5(23-80)                | NA             | Mixed malignancies                                             | 5-FU or 5-FU based          | Fair |
| 40 | Tonyali O        | 2013 | Turkey                                                                                         | 37         | 46(30-75)                  | 1              | Breast cancer                                                  | TX+ Tra                     | Fair |
| 41 | Okines AFC       | 2013 | UK                                                                                             | 101<br>99  | 62(56-67)<br>64(56-69)     | 0.321<br>0.182 | Gastro-esophageal<br>adenocarcinoma                            | ECX<br>ECX+ Bev             | Good |
| 42 | Uygun K          | 2013 | turkey                                                                                         | 68<br>64   | 53.6(21-79)<br>59.7(37-79) | 0.414          | Colorectal cancer                                              | XELIRI+ Bev<br>FOLFIRI+ Bev | Fair |
| 43 | Mackey JR        | 2013 | Multi-country:<br>Canada, Spain,<br>Poland, France,<br>Hungary, UK,<br>Sweden , USA,<br>Brazil | 736        | 49(43-56)                  | 1              | Breast cancer                                                  | FAC                         | Good |
| 44 | Souglakos J      | 2012 | Greece                                                                                         | 166<br>167 | 67(26-80)<br>66(33-80)     | 0.343<br>0.377 | Colorectal cancer                                              | CapIRI+ Bev<br>FOLFIRI+ Bev | Good |
| 45 | Cetin B          | 2012 | Turkey                                                                                         | 203        | 47(25-72)                  | 1              | Breast cancer                                                  | Cap+ Lap                    | Fair |
| 46 | Lang I           | 2012 | Multi-country:<br>Hungary, Israel,                                                             | 277        | 59(27-86)                  | 0.986          | Breast cancer                                                  | Cap+ Bev                    | good |

|    |                |      |                                                                                                                                                               |            |                        |       |                          |                        |      |
|----|----------------|------|---------------------------------------------------------------------------------------------------------------------------------------------------------------|------------|------------------------|-------|--------------------------|------------------------|------|
|    |                |      | Austria, Bosnia<br>and Herzegovina,<br>Latvia I, Germany                                                                                                      |            |                        |       |                          |                        |      |
| 47 | Nishimura<br>Y | 2012 | Japan                                                                                                                                                         | 42         | 63(45-74)              | 0.108 | Esophageal cancer        | FP+RT                  | Good |
|    |                |      |                                                                                                                                                               | 45         | 63(48-74)              | 0.088 |                          | FP+RT                  |      |
| 48 | Cen P          | 2012 | USA, SEER data                                                                                                                                                | 5472       | 74.2(65-99)            | 0.504 | Colorectal cancer        | 5-FU                   | Fair |
| 49 | Khan MA        | 2012 | Pakistani                                                                                                                                                     | 301        | 47(18-81)              | 0.249 | Mixed malignancies       | 5-FU or 5-FU/Cap based | Fair |
| 50 | Martin M       | 2012 | Multi-country:<br>Spain, Russia,<br>France,<br>Switzerland                                                                                                    | 88         | 53(32-82)              | 0.988 | Breast cancer            | Cap+ Bev+ Tra          | Fair |
| 51 | Petrini L      | 2012 | Italy                                                                                                                                                         | 39         | 67(41-83)              | 0.154 | Hepatocellular carcinoma | 5-FU+ Sorafenib        | Good |
| 52 | Lopez L        | 2012 | Brazil                                                                                                                                                        | 240        | NA                     | NA    | Gastrointestinal cancer  | 5-FU or 5-FU based     | Fair |
| 53 | Dipetrillo T   | 2012 | USA                                                                                                                                                           | 26         | 50(39-75)              | NA    | Rectal adenocarcinoma    | mFOLFOX6+Bev           | Fair |
| 54 | Greil R        | 2011 | Multi-country:<br>Slovak republic,<br>Czech republic,<br>Austria, Slovenia,<br>Poland, Ukraine,<br>Romania,<br>Bulgaria, Cyprus,<br>Malta, Estonia,<br>Russia | 293        | 52(27-77)              | 1     | Breast cancer            | Cap+ Lap               | Fair |
| 55 | Robert NJ      | 2011 | Multi-country:<br>USA, France,<br>Ukraine, Russia,                                                                                                            | 201<br>404 | 57(23-88)<br>56(28-91) | 1     | Breast cancer            | Cap<br>Cap+ Bev        | Good |

|    |             |      |                                                                                  |     |             |       |                                    |                        |      |
|----|-------------|------|----------------------------------------------------------------------------------|-----|-------------|-------|------------------------------------|------------------------|------|
|    |             |      | UK                                                                               |     |             |       |                                    |                        |      |
| 56 | Koca D      | 2011 | Turkey                                                                           | 52  | 59          | 0.75  | Mixed malignancies                 | Cap or Cap based+ Lap  | Fair |
| 57 | Jensen SA   | 2011 | Denmark                                                                          | 106 | 64(37-81)   | 0.556 | Colorectal cancer                  | FOLFOX4                | Good |
| 58 | Kato K      | 2010 | Japan                                                                            | 76  | 61(39-70)   | 0.105 | Esophageal squamous cell carcinoma | FP+RT                  | Fair |
| 59 | Wildiers H  | 2010 | Belgium                                                                          | 53  | 51(25-74)   | 1     | Breast cancer                      | TX                     | Fair |
|    |             |      |                                                                                  | 50  | 50.5(25-76) |       |                                    | TX+ Tra                |      |
| 60 | Torrise R   | 2010 | Italy                                                                            | 32  | 47(28-69)   | 1     | Breast cancer                      | CCF+ Tra               | Fair |
| 61 | Masi G      | 2010 | Italy                                                                            | 57  | 61(34-75)   | 0.4   | Colorectal cancer                  | FOLFOXIRI+ Bev         | Good |
| 62 | Michalaki V | 2010 | Greece                                                                           | 29  | 52(34-70)   | 1     | Breast cancer                      | TX+ Tra                | Good |
| 63 | Chua YJ     | 2010 | Australia                                                                        | 105 | 64(54-70)   | 0.46  | Rectal cancer                      | XELOX                  | Good |
| 64 | Wardley AM  | 2010 | Multi-country: Mexico, Brazil, Costa Rica, Poland, Switzerland, Australia, Spain | 112 | 53(24-82)   | 1     | Breast cancer                      | TX+ Tra or Taxane+ Tra | Good |
| 65 | Baur M      | 2010 | Austria                                                                          | 71  | 62(39-84)   | 0.394 | Rectal cancer                      | 5-FU based             | Fair |
| 66 | Hu W        | 2010 | China                                                                            | 34  | 62(55-69)   | 1     | Breast cancer                      | Cap                    | Fair |
|    |             |      |                                                                                  | 37  |             |       |                                    | CEF                    |      |
| 67 | Martin M    | 2010 | Multi-country: Spain, Germany, and Poland                                        | 521 | 49(23-73)   | 1     | Breast cancer                      | FAC                    | Good |
| 68 | Joensuu H   | 2009 | Multi-country: Helsinki, Tampere,                                                | 115 | ≤65         | 1     | Breast cancer                      | 5-FU based+ Tra        | Good |
|    |             |      |                                                                                  | 116 |             |       |                                    | 5-FU based             |      |

|    |               |      |                                                                                   |            |                            |       |                                    |                                                    |      |  |
|----|---------------|------|-----------------------------------------------------------------------------------|------------|----------------------------|-------|------------------------------------|----------------------------------------------------|------|--|
|    |               |      | Hameenlinna,<br>Pori, Oulu, Turku,<br>Kotka, Vaasa,<br>Finland                    |            |                            |       |                                    |                                                    |      |  |
| 69 | Osawa S       | 2009 | Japan                                                                             | 33         | 66(55-82)                  | 0.242 | Esophageal squamous cell carcinoma | Nedaplatin/5-FU+ RT                                | Fair |  |
| 70 | Pisano C      | 2009 | Italy                                                                             | 36         | 60(42-76)                  | NA    | Ovarian cancer                     | Cap                                                | Fair |  |
| 71 | Bathe OF      | 2009 | Canada                                                                            | 35         | 59±8                       | 0.314 | Colorectal cancer                  | FOLFIRI                                            | Fair |  |
| 72 | Skof E        | 2009 | Slovenia                                                                          | 41         | 63(47-75)                  | 0.366 | Colorectal cancer                  | XELIRI                                             | Good |  |
|    |               |      |                                                                                   | 46         | 62(34-75)                  |       |                                    | FOLFIRI                                            |      |  |
| 73 | Giuliani F    | 2008 | Italy                                                                             | 41         | 63(44-73)                  | 0.366 | Gastric cancer                     | EDF                                                | Fair |  |
| 74 | Ardavanis A   | 2008 | Greece                                                                            | 34         | 69.5(37-83)                | 0.47  | Colorectal cancer                  | CapIRI+ Bev                                        | Fair |  |
| 75 | Kosmas C      | 2008 | Greece                                                                            | 644        | 66(56-70)                  | NA    | Mixed malignancies                 | 5-FU based or Cap based                            | Good |  |
| 76 | Rothenberg ML | 2008 | Multi-country:<br>USA, Canada,<br>Spain, Republic of<br>Korea,<br>Switzerland, UK | 311<br>308 | 59.7(26-83)<br>60.7(26-81) | 0.38  | Colorectal cancer                  | XELOX<br>FOLFOX-4                                  | Good |  |
| 77 | Yamamoto D    | 2007 | Japan                                                                             | 59         | 55(42-70)                  | 1     | Breast cancer                      | Cap+ Tra                                           | Good |  |
| 78 | Natoli C      | 2007 | Italy                                                                             | 44         | 18-65                      | 1     | Breast cancer                      | Epirubicin/<br>Cyclophosphamide/<br>Docetaxel/ Cap | Fair |  |
| 79 | Neri B        | 2007 | Italy                                                                             | 36         | 58(39-72)                  | 0.305 | Gastric carcinoma                  | 5-FU/ Epirubicin                                   | Fair |  |

|    |                                     |               |            |                              |                        |                |                               |                                                              |      |
|----|-------------------------------------|---------------|------------|------------------------------|------------------------|----------------|-------------------------------|--------------------------------------------------------------|------|
| 80 | Machiels JP                         | 2007          | Belgium    | 40                           | 61(34-78)              | 0.33           | Rectal cancer                 | Cap+ Cet+ RT                                                 | Fair |
| 81 | Sasamoto R                          | 2007          | Japan      | 68<br>68                     | 40–79(65)              | 0.103          | Esophageal cancer             | FP+RT                                                        | Fair |
| 82 | Buzdar AU                           | 2007          | USA        | 19<br>45                     | 48(25-75)<br>52(29-71) | 1              | Breast cancer                 | Paclitaxel+ FEC<br>Paclitaxe+ FEC+ Tra                       | Fair |
| 83 | Yilmaz U                            | 2007          | Turkey     | 27                           | 54(19–70)              | 0.444          | Gastrointestinal cancer       | LV5FU2                                                       | Fair |
| 84 | ECOG-E3205/<br>Garg MK <sup>c</sup> | 2007/2<br>017 | USA        | 62                           | 56(37-48)              | 0.803          | Anal carcinoma                | FP+ Cet+ RT                                                  | Good |
| 85 | Rossi D                             | 2007          | Italy      | 37                           | 62(38-87)              | 1              | Breast cancer                 | Cap                                                          | Fair |
| 86 | Emmanouilides C                     | 2007          | Greece     | 53                           | 65(18–78)              | 0.434          | Colorectal cancer             | FOLFOX+ Bev                                                  | Fair |
| 87 | Geyer CE                            | 2006          | USA        | 163<br>161                   | 54(26-80)<br>51(28-83) | 1              | Breast cancer                 | Cap+ Lap<br>Cape                                             | Good |
| 88 | Mambrini A                          | 2006          | Italy      | 211                          | 61(21-79)              | NA             | Pancreatic cancer             | FEC                                                          | Good |
| 89 | Thatai LC                           | 2006          | USA        | 39                           | 49(29–66)              | 1              | Breast cancer                 | TAF                                                          | Fair |
| 90 | Koopman M                           | 2006          | Netherland | 199<br>194                   | 64(27-84)<br>63(35-79) | 0.373<br>0.396 | Colorectal cancer             | Cap<br>CapIRI                                                | Good |
| 91 | Jensen SA                           | 2006          | Denmark    | 214<br>81<br>352<br>10<br>11 | NA                     | NA             | Colorectal or gastric cancers | Cap<br>Cap/ Capatin/ Docetaxel<br>5-FU<br>LV5FU2<br>FOLFOX-4 | Fair |
| 92 | Velenik V                           | 2006          | Slovenia   | 57                           | 67(34-81)              | 0.245          | Rectal adenocarcinoma         | Cap+ RT                                                      | Fair |

|     |                                      |           |                                                                               |      |               |       |                                                         |                                     |      |
|-----|--------------------------------------|-----------|-------------------------------------------------------------------------------|------|---------------|-------|---------------------------------------------------------|-------------------------------------|------|
| 93  | Rapidis AD                           | 2006      | Greece                                                                        | 42   | 58(31-70)     | 0.166 | Head and neck carcinoma                                 | TPF+ RT                             | Fair |
| 94  | Yerushalmi R                         | 2006      | Israel                                                                        | 43   | 66(25-82)     | 0.418 | Rectal cancer                                           | Cap+ RT                             | Fair |
|     |                                      |           |                                                                               | 46   | 62(23-81)     | 0.5   |                                                         | 5-FU+RT                             |      |
| 95  | Tsibiribi P                          | 2006      | France                                                                        | 1350 | NA            | NA    | Mixed malignancies                                      | 5-FU                                | Fair |
| 96  | Klautke G                            | 2006      | Germany                                                                       | 28   | 64(48-75)     | 0.571 | Rectal cancer                                           | CapIRI+RT                           | Fair |
| 97  | Giordano KF                          | 2006      | USA                                                                           | 44   | 57(32-77)     | 0.114 | Gastric or gastro-esophageal junction adenocarcinoma    | TX                                  | Fair |
| 98  | ECOG-E2200/Giantonio BJ <sup>c</sup> | 2006      | USA                                                                           | 87   | 59(29.7-84.9) | 0.395 | Colorectal cancer                                       | FOLFIRI                             | Good |
| 99  | Jatoi A                              | 2006      | USA                                                                           | 46   | 61(32-80)     | 0.116 | Esophageal or gastro-esophageal junction adenocarcinoma | XELOX                               | Fair |
| 100 | Baghi M                              | 2006      | Germany                                                                       | 24   | 60(23-79)     | 0.042 | Head and neck squamous cell carcinoma                   | TPF                                 | Fair |
| 101 | ECOG-E2204/Berlin DJ <sup>c</sup>    | 2006/2018 | USA                                                                           | 130  | 59(29.2-92.9) | 0.5   | Pancreatic cancer                                       | Cap/ Gemcitabine/+ Cet or Bev +- RT | Good |
| 102 | ECOG-E3204/Landry JC <sup>c</sup>    | 2006/2015 | USA                                                                           | 55   | NA            | NA    | Rectal cancer                                           | XELOX+ Bev+ RT                      | Fair |
| 103 | Gianni L                             | 2005      | Multi-country: Italy, Spain, Germany, Russia, Poland, Hungary, Czech Republic | 1233 | NA            | 1     | Breast cancer                                           | Doxorubicin/ Docetaxel/ CMF         | Fair |

|     |                                               |               |             |            |                     |       |                                          |                      |                     |
|-----|-----------------------------------------------|---------------|-------------|------------|---------------------|-------|------------------------------------------|----------------------|---------------------|
| 104 | Meydan N                                      | 2005          | Turkey      | 231        | 59(23-87)           | 0.402 | Mixed malignancies                       | LV5FU2               | Fair                |
| 105 | ECOG-<br>E4203/<br>Meropol<br>NJ <sup>c</sup> | 2005/2<br>018 | USA         | 205        | 60(29-85)           | 0.403 | Colorectal cancer                        | mFOLFOX6+Bev         | Fair                |
| 106 | Tsavaris N                                    | 2005          | Greece      | 522        | NA                  | NA    | Mixed malignancies                       | 5-FU based           | Fair                |
| 107 | Ceyhan C                                      | 2005          | Turkey      | 37         | 62(22-83)           | 0.297 | Mixed malignancies                       | HDLV5-FU             | Fair                |
| 108 | Bontenbal<br>M                                | 2005          | Netherlands | 107        | 54(31-70)           | 1     | Breast cancer                            | FAC                  | Good                |
| 109 | Levine MN                                     | 2005          | Canada      | 359<br>351 | 40-49               | 1     | Breast cancer:                           | CMF+ RT<br>CEF+ RT   | Good                |
| 110 | Lordick F                                     | 2005          | Germany     | 48         | 62(41-75)           | 0.187 | Gastric cancer                           | FOLFOX               | Fair                |
| 111 | Ng M                                          | 2005          | UK          | 153        | 33-81               | 0.412 | Colorectal cancer                        | CapeOx               | Good                |
| 112 | Smaradotti<br>r A                             | 2005          | USA         | 12         | 64                  | 0.083 | Head and neck squamous cell<br>carcinoma | TPF                  | Fair                |
| 113 | Keene KS                                      | 2005          | USA         | 28         | 64(41-82)           | 0.571 | Pancreatic adenocarcinoma                | 5-FU+RT              | Fair                |
| 114 | Feliu J                                       | 2005          | Spain       | 51         | 76(71-89)           | 0.392 | Colorectal cancer                        | Cap                  | Fair                |
| 115 | Berruti A                                     | 2005          | Italy       | 61         | 54.3(30.6-<br>70.7) | 1     | Breast cancer                            | Vinorelbine/<br>5-FU | Paclitaxel/<br>Fair |
| 116 | Erman M                                       | 2005          | Turkey      | 88         | 47±10               | 1     | Breast cancer                            | FEC+T                | Fair                |
| 117 | Berruti A                                     | 2005          | Italy       | 53         | 58.9(30.4-<br>75.8) | 1     | Breast cancer                            | Vinorelbine/<br>5-FU | Paclitaxel/<br>Fair |
| 118 | ECOG-<br>E1103/ Li<br>TH <sup>c</sup>         | 2004/2<br>012 | USA         | 68         | 52(35-79)           | 1     | Breast cancer                            | Cap+ Tipifarnib      | Good                |
| 119 | Oztop I                                       | 2004          | Turkey      | 22         | 63(44-76)           | 0.364 | Gastrointestinal cancer                  | LV5FU2               | Fair                |



|     |                                                 |               |             |                   |                                   |                         |                                                         |                                         |      |
|-----|-------------------------------------------------|---------------|-------------|-------------------|-----------------------------------|-------------------------|---------------------------------------------------------|-----------------------------------------|------|
| 120 | Martin M                                        | 2003          | Spain       | 505<br>480        | 18-72                             | 1                       | Breast cancer                                           | CMF<br>FAC                              | Good |
| 121 | Daniele B                                       | 2003          | Italy       | 34                | 76(70–85)                         | 0.25                    | Colorectal cancer                                       | LV5FU2                                  | Fair |
| 122 | Elomaa I                                        | 2003          | Finland     | 40                | 53(32-69)                         | 1                       | Breast cancer                                           | FNE                                     | Fair |
| 123 | Wacker A                                        | 2003          | Germany     | 102               | 61.7(39-78)                       | 0.311                   | Mixed malignancies                                      | 5-FU or 5-FU based                      | Fair |
| 124 | ECOG-<br>E3201                                  | 2003/2<br>018 | USA         | 59<br>58<br>62    | NA                                | 0.322<br>0.379<br>0.306 | Rectal cancer                                           | FOLFIRI<br>mFOLFOX6<br>LV5FU2           | Good |
| 125 | Hitt R                                          | 2002          | Spain       | 70                | 61(37-75)                         | 0.014                   | Head and neck squamous cell<br>carcinoma                | TPF                                     | Fair |
| 126 | Vaishampa<br>yan UN                             | 2002          | USA         | 32                | 67.5(45–84)                       | 0.375                   | Gastrointestinal cancer                                 | Cap+ RT                                 | Fair |
| 127 | Tsavaris N                                      | 2002          | Greece      | 427               | NA                                | NA                      | Mixed malignancies                                      | 5-Fu based                              | Fair |
| 128 | Van<br>Cutsem E                                 | 2002          | Switzerland | 593<br>596<br>236 | NA<br>NA<br>NA                    | NA                      | Colorectal cancer<br>Colorectal cancer<br>Breast cancer | LV5FU2<br>Cap<br>Cap                    | Fair |
| 129 | ECOG-<br>E3200/<br>Giantonio<br>BJ <sup>c</sup> | 2001/2<br>007 | USA         | 808<br>286<br>291 | 21-85<br>62(21-85)<br>60.8(25-84) | 0.39<br>0.395<br>0.392  | Colorectal cancer                                       | mFOLFOX6+Bev<br>FOLFOX4 +Bev<br>FOLFOX4 | Good |
| 130 | Hartung G                                       | 2001          | Germany     | 51                | 60(24-77)                         | 0.25                    | Colorectal cancer                                       | LV5FU2                                  | Fair |
| 131 | Dencausse<br>Y                                  | 2001          | Germany     | 21                | 30-80                             | 0.333                   | Rectal cancer                                           | LV5FU2+RT                               | Fair |
| 132 | Recchia F                                       | 2001          | Italy       | 28                | 62(28-75)                         | 1                       | Breast cancer                                           | FE                                      | Fair |
| 133 | Riccardi A                                      | 2001          | Italy       | 69                | 54(34-70)                         | 1                       | Breast cancer                                           | FEC+T                                   | Fair |
| 134 | Piccart MJ                                      | 2001          | Belgium     | 255               | ≤70                               | 1                       | Breast cancer                                           | CMF                                     | Fair |

|     |                 |      |                                                                                                          |            |                        |              |                          |                      |      |
|-----|-----------------|------|----------------------------------------------------------------------------------------------------------|------------|------------------------|--------------|--------------------------|----------------------|------|
| 135 | Jassem J        | 2001 | Multi-country:<br>Poland,<br>Yugoslavia,<br>Russia, Croatia,<br>Latvia, Hungary,<br>Israel, Belgium      | 123        | 50(24-74)              | 1            | Breast cancer            | FAC                  | Good |
| 136 | Peiffert D      | 2001 | France                                                                                                   | 80         | ≤75                    | 0.837        | Anal cancer              | FP+RT                | Fair |
| 137 | Ackland SP      | 2001 | Multi-country:<br>Australia,<br>Bulgaria, Roma,<br>Spain, Italy,<br>Germany, Russia,<br>Uruguay, Hungary | 218<br>236 | 56(22-71)<br>55(26-71) | 1            | Breast cancer            | CEF<br>CMF           | Good |
| 138 | Pienkowski<br>T | 2001 | Poland                                                                                                   | 65         | 48(31-70)              | 1            | Breast cancer            | FN                   | Fair |
| 139 | Blum JL         | 2001 | USA                                                                                                      | 74         | 52(29-77)              | 1            | Breast cancer            | Cape                 | Fair |
| 140 | Hoff PM         | 2001 | Multi-country:<br>USA, Canada,<br>UK, Switzerland                                                        | 302<br>303 | 64(23-86)<br>63(24-87) | 0.40<br>0.35 | Colorectal cancer        | Cape<br>LV5FU2       | Good |
| 141 | Lin JK          | 2000 | China Taiwan                                                                                             | 40         | 66(27-78)              | 0.425        | Colorectal cancer        | S-1                  | Fair |
| 142 | Zambelli A      | 2000 | Italy                                                                                                    | 48         | 52(29-72)              | 1            | Breast cancer            | FN                   | Fair |
| 143 | Balloni L       | 2000 | Italy                                                                                                    | 25         | NA                     | NA           | Colon cancer             | 5-FU                 | Fair |
| 144 | Susvnjar S      | 1999 | Yugoslavia                                                                                               | 19         | 47(32-64)              | 1            | Breast cancer            | LV5FU2/ Mitoxantrone | Fair |
| 145 | Valero V        | 1999 | USA                                                                                                      | 41         | ≥18                    | 1            | Breast cancer            | FAC                  | Fair |
| 146 | Hasbini A       | 1999 | Spain                                                                                                    | 44         | 45(20-72)              | 0.174        | Nasopharyngeal carcinoma | FMEP                 | Fair |
| 147 | Blum JL         | 1999 | Multi-country:                                                                                           | 162        | 55.8(26-78)            | 1            | Breast cancer            | Cap                  | Fair |

|     |                  |      |              |     |              |       |                                       |                     |      |
|-----|------------------|------|--------------|-----|--------------|-------|---------------------------------------|---------------------|------|
|     |                  |      | USA, Canada  |     |              |       |                                       |                     |      |
| 148 | Blajman C        | 1999 | Argentina    | 85  | 54(30–71)    | 1     | Breast carcinoma                      | FAC                 | Fair |
| 149 | Birkenhake S     | 1999 | Germany      | 25  | 62(31-79)    | 0.25  | Bladder cancer                        | FP+RT               | Fair |
| 150 | Milano G         | 1999 | French       | 19  | 58(36-73)    | 0.75  | Mixed malignancies                    | 5-FU based          | Fair |
| 151 | Warner E         | 1999 | Canada       | 30  | 60(41–81)    | 0.1   | Esophageal carcinoma                  | FP+LV               | Fair |
| 152 | Andersson M      | 1999 | Denmark      | 161 | 58(45-65)    | 1     | Breast cancer                         | CAF                 | Good |
|     |                  |      |              | 181 | 58(43-65)    |       |                                       | CMF                 |      |
| 153 | Mantovani G      | 1998 | Italy        | 16  | 54.4(38–72)  | 0.125 | Head and neck squamous-cell carcinoma | FP+ IL-2            | Good |
|     |                  |      |              | 17  | 56.75(48-66) | 0.117 |                                       | FP                  |      |
| 154 | Papadimitriou CA | 1998 | Greece       | 24  | 56(35-71)    | 1     | Breast cancer                         | CMF+ Tra            | Fair |
| 155 | Katona C         | 1998 | Hungary      | 96  | 63(43-77)    | 0.312 | Colorectal cancer                     | LV5FU2              | Fair |
| 156 | Levine MN        | 1998 | Canada       | 256 | 40-49        | 1     | Breast cancer                         | CEF                 | Good |
|     |                  |      |              | 360 |              |       |                                       | CMF                 |      |
| 157 | Fetting JH       | 1998 | USA          | 307 | 48(25-77)    | 1     | Breast cancer:                        | CAF                 | Good |
|     |                  |      |              | 309 | 47(25-78)    |       |                                       | CMF                 |      |
| 158 | Seitz JF         | 1998 | France       | 24  | 59.7(41-73)  | 0.542 | Colorectal carcinoma                  | LV5FU2+ Mitomycin C | Fair |
| 159 | Tominaga T       | 1998 | Japan        | 20  | 40-70        | 1     | Breast cancer                         | FAC                 | Fair |
| 160 | Wang WS          | 1998 | China Taiwan | 41  | 62(35-68)    | 0.195 | Colorectal carcinoma                  | LV5FU2              | Good |
| 161 | Taylor SG        | 1997 | USA          | 78  | 61(30–83)    | 0.269 | Head and neck cancer                  | Cisplatin/5-FU+RT   | Fair |
| 162 | Yen CC           | 1997 | China Taiwan | 13  | 55           | 1     | Breast cancer                         | MFL                 | Fair |
| 163 | Meyer CC         | 1997 | USA          | 483 | 60.9±11.9    | 0.407 | Mixed malignancies                    | 5-FU based          | Fair |
| 164 | Bascioni R       | 1997 | Italy        | 46  | 63(34–78)    | 0.018 | Breast cancer                         | MFL                 | Fair |
| 165 | Kroning          | 1997 | Japan        | 27  | NA           | NA    | Gastric carcinoma                     | LV5FU2/ Epirubicin  | Fair |

|     |               |      |             |     |             |       |                                                        |                                    |      |
|-----|---------------|------|-------------|-----|-------------|-------|--------------------------------------------------------|------------------------------------|------|
| KC  |               |      |             |     |             |       |                                                        |                                    |      |
| 166 | Docì R        | 1996 | Italy       | 35  | 59(31-80)   | 0.857 | Anal cancer                                            | FP+RT                              | Fair |
| 167 | Ychou M       | 1996 | France      | 28  | 64(40-78)   | 0.143 | Gastric cancer                                         | FP/ LV                             | Fair |
| 168 | Kok TC        | 1996 | Netherlands | 29  | 60(41-74)   | 0.138 | Esophageal or esophago-gastric junction adenocarcinoma | LV5FU2                             | Fair |
| 169 | Gebbia V      | 1996 | Italy       | 33  | 62(46-75)   | 0.242 | Colorectal cancer                                      | 5-FU/ LV/ IL-2                     | Fair |
| 170 | Hainsworth JD | 1996 | USA         | 46  | 52,32-74    | 1     | Breast cancer                                          | Paclitaxel/ Mitoxantrone/ 5-FU/ LV | Fair |
| 171 | Hartung G     | 1996 | Germany     | 16  | 54.4        | 0.5   | Colorectal cancer                                      | 5-FU/ Levamisole                   | Fair |
|     |               |      |             | 29  | 59.7        | 0.379 |                                                        | 5-FU/ LV                           |      |
| 172 | Colozza M     | 1996 | Italy       | 28  | 57(42-76)   | 1     | Breast cancer                                          | LV5FU2/ Mitoxantrone               | Fair |
| 173 | Mammoliti S   | 1996 | Italy       | 24  | 65(65-75)   | 1     | Breast cancer                                          | LV5FU2/ Mitoxantrone               | Fair |
| 174 | Becouarn YH   | 1996 | France      | 86  | 62(39-82)   | 0.512 | Colorectal cancer                                      | LV5FU2                             | Fair |
| 175 | Blijham GH    | 1996 | Europe      | 312 | NA          | NA    | Colorectal cancer                                      | 5-FU/ Methotrexate                 | Fair |
| 176 | Macdonald JS  | 1995 | USA         | 90  | 59(27-75)   | 0.366 | Gastric carcinoma.                                     | FAM                                | Fair |
| 177 | Weidmann B    | 1995 | Germany     | 231 | NA          | NA    | Mixed malignancies                                     | 5-FU based                         | Fair |
| 178 | Kolaric K     | 1995 | Austria     | 237 | 50.5(33-71) | 1     | Breast cancer                                          | FAC/ Cardioxane(ICRF-187)          | Fair |
| 179 | Alonso MC     | 1995 | Spain       | 50  | 55(30-72)   | 1     | Breast cancer                                          | CNF                                | Good |
|     |               |      |             | 50  | 55(31-74)   |       |                                                        | CAF                                |      |
| 180 | Leonardi V    | 1995 | Italy       | 34  | 56(33-74)   | 1     | Breast cancer                                          | CNF+LV                             | Fair |

|     |                  |      |                                                                                                       |     |              |       |                                          |                                          |      |
|-----|------------------|------|-------------------------------------------------------------------------------------------------------|-----|--------------|-------|------------------------------------------|------------------------------------------|------|
| 181 | Carmo-Pereira J  | 1995 | Portugal                                                                                              | 38  | 50.5(34-65)  | 1     | Breast carcinoma                         | CEF                                      | Fair |
| 182 | Haas NB          | 1995 | USA                                                                                                   | 38  | 62.5(38-76)  | 0.368 | Colorectal cancer                        | LV5FU2                                   | Fair |
| 183 | Klastersky J     | 1994 | Multi-country:<br>Belgium,<br>Luxembourg,<br>France                                                   | 182 | 61(34-77)    | 0.121 | Lung cancer                              | Cisplatin/ mitomycin/<br>Vindesine/ 5-FU | Fair |
| 184 | Morere JF        | 1994 | France                                                                                                | 109 | 57(40-75)    | 0.146 | Lung cancer                              | FP                                       | Fair |
| 185 | Villar-Grimalt A | 1994 | Multi-country:<br>Spain, England,<br>Italy                                                            | 18  | 62(46-72)    | 0.5   | Colorectal adenocarcinoma                | 5-FU/ Adriamycin                         | Fiar |
| 186 | Haarstad H       | 1994 | Norway                                                                                                | 30  | 56(17-71)    | 0.451 | Renal cell carcinoma                     | 5-FU/ IFN- $\alpha$                      | Fair |
| 187 | Akhtar SS        | 1993 | Jammu and<br>Kashmir                                                                                  | 100 | 49.96(30-70) | 0.38  | Mixed malignancies                       | FP or FM or 5-FU                         | Fair |
| 188 | Langer CJ        | 1993 | USA                                                                                                   | 40  | 58(38-84)    | 0.45  | Lung cancer                              | Epirubicin/ Cisplatin/ 5-<br>FU+ RT      | Fair |
| 189 | Depondt J        | 1993 | France                                                                                                | 150 | 55           | 0.1   | Head and neck cancer                     | FP                                       | Good |
| 190 | Carmo-Pereira J  | 1993 | Portugal                                                                                              | 36  | 54(32-68)    | 1     | Breast carcinoma.                        | Mitoxantrone/ 5-FU/ LV/<br>Prednisone    | Fair |
| 191 | Neri B           | 1993 | Italy                                                                                                 | 35  | 58(38-72)    | 0.2   | Gastric cancer                           | 5-FU/ Epirubicin                         | Fair |
| 192 | Jassem J         | 1993 | Multi-country:<br>Hungary, Poland,<br>Czech and Slovak<br>Republic, The<br>Netherland,<br>Yugoslavia, | 189 | 55(31-75)    | 0.132 | Head and neck squamous-cell<br>carcinoma | FP                                       | Fair |

|     |                |      |            |      |                   |       |                                        |                       |      |
|-----|----------------|------|------------|------|-------------------|-------|----------------------------------------|-----------------------|------|
|     |                |      | Croatia    |      |                   |       |                                        |                       |      |
| 193 | Keefe DL       | 1993 | USA        | 910  | 47-68             | NA    | Mixed malignancies                     | 5-FU based            | Fair |
| 194 | Schober C      | 1993 | Germany    | 390  | 27-75             | 0.75  | Gastrointestinal cancer                | LV5FU2                | Fair |
| 195 | Levine MN      | 1993 | Canada     | 288  | ≤60               | 1     | Breast cancer                          | CEF                   | Fair |
| 196 | Kuzel TM       | 1993 | USA        | 22   | 69(54-79)         | 1     | Prostate cancer                        | 5-FU                  | Fair |
| 197 | Citron ML      | 1992 | USA        | 86   | 62(33-79)         | 0.24  | Lung cancer                            | 5-FU                  | Fair |
| 198 | de Forni M     | 1992 | France     | 367  | 57(32-75)         | 0.373 | Mixed malignancies                     | 5-FU based            | Fair |
| 199 | Zaniboni A     | 1991 | Italy      | 30   | NA                | 0.4   | Gastric cancer                         | FAM                   | Fair |
| 200 | Gradishar W    | 1991 | USA        | 244  | 35-83             | NA    | Mixed malignancies                     | 5-FU based            | Fair |
| 201 | Perit P        | 1991 | Italy      | 31   | ≤75               | 1     | Breast carcinoma                       | FEC                   | Good |
|     |                |      |            | 29   |                   | 1     |                                        | FNC                   |      |
| 202 | Zamagni C      | 1991 | Italy      | 30   | 56(36-71)         | 1     | Breast cancer                          | FEC                   | Fair |
| 203 | Schlumberger M | 1991 | France     | 14   | 31-61             | NA    | Adrenal cortical carcinoma             | ECF                   | Fair |
| 204 | Jeremic B      | 1990 | Yugoslavia | 65   | 63(40-72)         | 0.188 | Mixed malignancies                     | FP                    | Fair |
| 205 | Samonigg H     | 1990 | Austria    | 21   | 52.5(41-69)       | 1     | Breast cancer                          | Doxorubicin/ 5-FU/ LV | Fair |
| 206 | Eskilsson J    | 1990 | NA         | 58   | 61(39-76)         | 0.276 | Mixed malignancies                     | FP                    | Fair |
| 207 | Havsteen H     | 1989 | Denmark    | 11   | 56(46-64)         | 1     | Breast cancer                          | CMF/ Doxorubicin      | Fair |
| 208 | Rezkalla S     | 1989 | Turi       | 25   | 60(41-79)         | 0.28  | Head and neck squamous cell carcinomas | 5-FU+FP               | Fair |
| 209 | Eskilsson J    | 1988 | Sweden     | 76   | 64(28-80)         | 0.118 | Mixed malignancies                     | FP                    | Fair |
| 210 | Labianca R     | 1982 | Milano     | 1083 | <55:38.7%;>55:61% | NA    | Mixed malignancies                     | 5-FU or 5-FU based    | Fair |
| 211 | Pottage A      | 1978 | UK         | 140  | NA                | NA    | Mixed malignancies                     | 5-FU                  | Fair |

Notes: a, Mixed malignancies: including two or more tumor types, such as breast cancer, colorectal cancer, gastric cancer, head and neck cancer, and so on; b, fluoropyrimidine: the article only stated that fluoropyrimidine agent was used, but did not specify which drug it was, or contained more than two types of fluoropyrimidines (e.g. 5-FU and capecitabine); c, data from both clinical trials (<https://clinicaltrials.gov/>) and published articles; NA: not available; RT: Radiotherapy; Cap: Capecitabine; Bev: Bevacizumab; Cet: Cetuximab; Pan: Panitumumab; Tra, Trastuzumab; Lap, Lapatinib.

*Chemotherapy regimens as follows:* CAF: Cyclophosphamide/ Adriamycin/ 5-FU; CapeOx: Oxaliplatin/ Cap; vinorelbine/ paclitaxel/5-FU; CapIRI: Cap/ Irinotecan; CCF: Doxorubicin/ Cisplatin/ 5-FU; CEF: 5-FU/ Epirubicin/ Cyclophosphamide; CMF: Cyclophosphamide/ Methotrexate/ 5-FU; CNF: Cyclophosphamide/ Mitoxantrone / 5-FU; ECX: Epirubicin/ cisplatin/ Cap; EDF: Epirubicin/ Docetaxel/ 5-FU; FAC: 5-FU/ Doxorubicin/ Cyclophosphamide; FAM: 5-FU/ Adriamycin/ Mitomycin-C; FE: 5-FU/ Doxorubicin/; FM: 5-FU/ Mitomycin-C; FMEP: 5-FU/ Epirubicin/ Mitomycin/ Cisplatin; FOLFOX: FN: 5-FU/ Vinorelbine; FOLFOXIRI: Irinotecan/ Oxaliplatin/ LV/ 5-FU; FOLFIRI: Irinotecan/ 5-FU/ LV; FP: 5-FU/ cisplatin; HDLV5-FU: High-dose/ LV; MFL: Mitoxantrone/ 5-FU/ LV; NEF: Vinorelbine/ Epirubicin/ 5-FU; Oxaliplatin/ LV(Leucovorin)/ 5-FU; SOX: Oxaliplatin/ S-1; **SP: S-1/Cisplatin**; TAF: Docetaxel/ Doxorubicin/ 5-FU; TPF: Docetaxel/ Cisplatin/ 5-FU; TX: Docetaxel/ Cap; XELOX: Oxaliplatin/ Cap; XELIRI: Irinotecan/ Cap; LV5FU2: LV/ 5-FU
