# Supplementary material
Source: MDPI journal article supplement (https://www.mdpi.com/1424-8247/16/4/510)
Supplement: s1 [file s1]

| Study                                                        | Events | Total        | Proportion                | 95%-CI                  | Weight        |
|--------------------------------------------------------------|--------|--------------|---------------------------|-------------------------|---------------|
| Mayer IA 2021                                                | 1      | 198          | 0.0051                    | [0.0001; 0.0278]        | 1.2%          |
| Dyhl-Polk A 2020(1)                                          | 17     | 108          | 0.1574                    | [0.0945; 0.2400]        | 1.1%          |
| Osterlund P 2020                                             | 5      | 141          | 0.0355                    | [0.0116; 0.0808]        | 1.1%          |
| Delaloge S 2020                                              | 4      | 628          | 0.0064                    | [0.0017; 0.0162]        | 1.3%          |
| Dyhl-Polk A 2020(2)-A1                                       | 32     | 995          | 0.0322                    | [0.0221; 0.0451]        | 1.3%          |
| Dyhl-Polk A 2020(2)-A2                                       | 31     | 1241         | 0.0250                    | [0.0170; 0.0353]        | 1.3%          |
| Jin X 2019                                                   | 26     | 129          | 0.2016                    | [0.1361; 0.2812]        | 1.1%          |
| Rivera F 2019                                                | 2      | 45           | 0.0444                    | [0.0054; 0.1515]        | 0.9%          |
| Chen EY 2018                                                 | 2      | 47           | 0.0426                    | [0.0052; 0.1454]        | 0.9%          |
| Yang H 2018-A1                                               | 3      | 30           | 0.1000                    | [0.0211; 0.2653]        | 0.7%          |
| Yang H 2018-A2                                               | 2      | 30           | 0.0667                    | [0.0082; 0.2207]        | 0.7%          |
| Alderson D 2017-A1                                           | 13     | 446          | 0.0291                    | [0.0156; 0.0493]        | 1.2%          |
| Alderson D 2017-A2                                           | 17     | 441          | 0.0385                    | [0.0226; 0.0610]        | 1.2%          |
| Kwakman JJM 2017                                             | 73     | 1973         | 0.0370                    | [0.0291; 0.0463]        | 1.3%          |
| Harbeck N 2017                                               | 30     | 102          | 0.2941                    | [0.2080; 0.3925]        | 1.1%          |
| Kerr RS 2016-A1                                              | 40     | 973          | 0.0411                    | [0.0295; 0.0556]        | 1.3%          |
| Kerr RS 2016-A2                                              | 48     | 968          | 0.0496                    | [0.0368; 0.0652]        | 1.3%          |
| Mayer RJ 2015                                                | 2      | 534          | 0.0037                    | [0.0005; 0.0135]        | 1.3%          |
| Cetin B 2012                                                 | 0      | 203          | 0.0000                    | [0.0000; 0.0180]        | 1.2%          |
| Nishimura Y 2012-A1                                          | 0      | 42           | 0.0000                    | [0.0000; 0.0841]        | 0.8%          |
| Nishimura Y 2012-A2                                          | 2      | 45           | 0.0444                    | [0.0054; 0.1515]        | 0.9%          |
| Martin M 2012                                                | 3      | 88           | 0.0341                    | [0.0071; 0.0964]        | 1.0%          |
| Petrini L 2012                                               | 0      | 39           | 0.0000                    | [0.0000; 0.0903]        | 0.8%          |
| Greil R 2011                                                 | 3      | 293          | 0.0102                    | [0.0021; 0.0296]        | 1.2%          |
| Kato K 2010                                                  | 11     | 76           | 0.1447                    | [0.0745; 0.2442]        | 1.0%          |
| Wildiers H 2010-A1                                           | 0      | 53           | 0.0000                    | [0.0000; 0.0672]        | 0.9%          |
| Wildiers H 2010-A2                                           | 0      | 50           | 0.0000                    | [0.0000; 0.0711]        | 0.9%          |
| Michalaki V 2010                                             | 0      | 29           | 0.0000                    | [0.0000; 0.1194]        | 0.7%          |
| Baur M 2010                                                  | 3      | 71           | 0.0423                    | [0.0088; 0.1186]        | 1.0%          |
| Hu W 2010-A1                                                 | 2      | 34           | 0.0588                    | [0.0072; 0.1968]        | 0.8%          |
| Hu W 2010-A2                                                 | 8      | 37           | 0.2162                    | [0.0983; 0.3821]        | 0.8%          |
| Osawa S 2009                                                 | 7      | 33           | 0.2121                    | [0.0898; 0.3891]        | 0.8%          |
| Pisano C 2009                                                | 0      | 36           | 0.0000                    | [0.0000; 0.0974]        | 0.8%          |
| Bathe OF 2009                                                | 0      | 35           | 0.0000                    | [0.0000; 0.1000]        | 0.8%          |
| Giuliani F 2008                                              | 0      | 41           | 0.0000                    | [0.0000; 0.0860]        | 0.8%          |
| Ardavanis A 2008                                             | 1      | 34           | 0.0294                    | [0.0007; 0.1533]        | 0.8%          |
| Yamamoto D 2007                                              | 1      | 59           | 0.0169                    | [0.0004; 0.0909]        | 0.9%          |
| Natoli C 2007                                                | 0      | 44           | 0.0000                    | [0.0000; 0.0804]        | 0.9%          |
| Neri B 2007                                                  | 0      | 36           | 0.0000                    | [0.0000; 0.0974]        | 0.8%          |
| Machiels JP 2007                                             | 0      | 40           | 0.0000                    | [0.0000; 0.0881]        | 0.8%          |
| Jensen SA 2006                                               | 2      | 668          | 0.0030                    | [0.0004; 0.0108]        | 1.3%          |
| Rapidis AD 2006                                              | 0      | 42           | 0.0000                    | [0.0000; 0.0841]        | 0.8%          |
| Giordano KF 2006                                             | 1      | 44           | 0.0227                    | [0.0006; 0.1202]        | 0.9%          |
| Gianni L 2005                                                | 145    | 1233         | 0.1176                    | [0.1001; 0.1369]        | 1.3%          |
| Lordick F 2005                                               | 0      | 48           | 0.0000                    | [0.0000; 0.0740]        | 0.9%          |
| Berruti A 2005                                               | 4      | 61           | 0.0656                    | [0.0182; 0.1595]        | 1.0%          |
| Erman M 2005                                                 | 7      | 88           | 0.0795                    | [0.0326; 0.1570]        | 1.0%          |
| Berruti A 2005                                               | 1      | 53           | 0.0189                    | [0.0005; 0.1007]        | 0.9%          |
| ECOG-E1103/ Li TH 2004/2012                                  | 10     | 68           | 0.1471                    | [0.0728; 0.2539]        | 1.0%          |
| Oztop I 2004                                                 | 0      | 22           | 0.0000                    | [0.0000; 0.1544]        | 0.6%          |
| Martin M 2003-A1                                             | 1      | 505          | 0.0020                    | [0.0001; 0.0110]        | 1.3%          |
| Martin M 2003-A2                                             | 7      | 480          | 0.0146                    | [0.0059; 0.0298]        | 1.2%          |
| Daniele B 2003                                               | 0      | 34           | 0.0000                    | [0.0000; 0.1028]        | 0.8%          |
| Elomaa I 2003                                                | 0      | 40           | 0.0000                    | [0.0000; 0.0881]        | 0.8%          |
| Hitt R 2002                                                  | 3      | 70           | 0.0429                    | [0.0089; 0.1202]        | 1.0%          |
| Vaishampayan UN 2002                                         | 0      | 32           | 0.0000                    | [0.0000; 0.1089]        | 0.8%          |
| Van Cutsem E 2002-A1                                         | 16     | 593          | 0.0270                    | [0.0155; 0.0434]        | 1.3%          |
| Van Cutsem E 2002-A2                                         | 14     | 596          | 0.0235                    | [0.0129; 0.0391]        | 1.3%          |
| Van Cutsem E 2002-A3                                         | 7      | 236          | 0.0297                    | [0.0120; 0.0602]        | 1.2%          |
| Hartung G 2001                                               | 0      | 51           | 0.0000                    | [0.0000; 0.0698]        | 0.9%          |
| Dencausse Y 2001                                             | 0      | 21           | 0.0000                    | [0.0000; 0.1611]        | 0.6%          |
| Recchia F 2001                                               | 3      | 28           | 0.1071                    | [0.0227; 0.2823]        | 0.7%          |
| Riccardi A 2001                                              | 2      | 69           | 0.0290                    | [0.0035; 0.1008]        | 1.0%          |
| Peiffert D 2001                                              | 2      | 80           | 0.0250                    | [0.0030; 0.0874]        | 1.0%          |
| Blum JL 2001                                                 | 0      | 74           | 0.0000                    | [0.0000; 0.0486]        | 1.0%          |
| Lin JK 2000                                                  | 0      | 40           | 0.0000                    | [0.0000; 0.0881]        | 0.8%          |
| Zambelli A 2000                                              | 0      | 48           | 0.0000                    | [0.0000; 0.0740]        | 0.9%          |
| Balloni L 2000                                               | 0      | 25           | 0.0000                    | [0.0000; 0.1372]        | 0.7%          |
| Susvnjar S 1999                                              | 1      | 19           | 0.0526                    | [0.0013; 0.2603]        | 0.6%          |
| Valero V 1999                                                | 2      | 41           | 0.0488                    | [0.0060; 0.1653]        | 0.8%          |
| Hasbini A 1999                                               | 1      | 44           | 0.0227                    | [0.0006; 0.1202]        | 0.9%          |
| Blum JL 1999                                                 | 0      | 162          | 0.0000                    | [0.0000; 0.0225]        | 1.1%          |
| Blajman C 1999                                               | 7      | 85           | 0.0824                    | [0.0338; 0.1623]        | 1.0%          |
| Birkenhake S 1999                                            | 0      | 25           | 0.0000                    | [0.0000; 0.1372]        | 0.7%          |
| Milano G 1999                                                | 0      | 19           | 0.0000                    | [0.0000; 0.1765]        | 0.6%          |
| Mantovani G 1998                                             | 1      | 33           | 0.0303                    | [0.0008; 0.1576]        | 0.8%          |
| Papadimitriou CA 1998                                        | 0      | 24           | 0.0000                    | [0.0000; 0.1425]        | 0.7%          |
| Fetting JH 1998-A1                                           | 14     | 307          | 0.0456                    | [0.0252; 0.0753]        | 1.2%          |
| Fetting JH 1998-A2                                           | 26     | 309          | 0.0841                    | [0.0557; 0.1209]        | 1.2%          |
| Seitz JF 1998                                                | 0      | 24           | 0.0000                    | [0.0000; 0.1425]        | 0.7%          |
| Tominaga T 1998                                              | 0      | 20           | 0.0000                    | [0.0000; 0.1684]        | 0.6%          |
| Wang WS 1998                                                 | 0      | 41           | 0.0000                    | [0.0000; 0.0860]        | 0.8%          |
| Taylor SG 1997                                               | 0      | 78           | 0.0000                    | [0.0000; 0.0462]        | 1.0%          |
| Yen CC 1997                                                  | 5      | 13           | 0.3846                    | [0.1386; 0.6842]        | 0.5%          |
| Kroning KC 1997                                              | 0      | 27           | 0.0000                    | [0.0000; 0.1277]        | 0.7%          |
| Ychou M 1996                                                 | 0      | 28           | 0.0000                    | [0.0000; 0.1234]        | 0.7%          |
| Kok TC 1996                                                  | 1      | 29           | 0.0345                    | [0.0009; 0.1776]        | 0.7%          |
| Gebbia V 1996                                                | 2      | 33           | 0.0606                    | [0.0074; 0.2023]        | 0.8%          |
| Hainsworth JD 1996                                           | 0      | 46           | 0.0000                    | [0.0000; 0.0771]        | 0.9%          |
| Colozza M 1996                                               | 0      | 28           | 0.0000                    | [0.0000; 0.1234]        | 0.7%          |
| Mammoliti S 1996                                             | 0      | 24           | 0.0000                    | [0.0000; 0.1425]        | 0.7%          |
| Becouarn YH 1996                                             | 1      | 86           | 0.0116                    | [0.0003; 0.0631]        | 1.0%          |
| Macdonald JS 1995                                            | 0      | 90           | 0.0000                    | [0.0000; 0.0402]        | 1.0%          |
| Leonardi V 1995                                              | 0      | 34           | 0.0000                    | [0.0000; 0.1028]        | 0.8%          |
| Carmo-Pereira J 1995                                         | 0      | 38           | 0.0000                    | [0.0000; 0.0925]        | 0.8%          |
| Haas NB 1995                                                 | 0      | 38           | 0.0000                    | [0.0000; 0.0925]        | 0.8%          |
| Klastersky J 1994                                            | 5      | 182          | 0.0275                    | [0.0090; 0.0629]        | 1.2%          |
| Morere JF 1994                                               | 3      | 109          | 0.0275                    | [0.0057; 0.0783]        | 1.1%          |
| Langer CJ 1993                                               | 0      | 40           | 0.0000                    | [0.0000; 0.0881]        | 0.8%          |
| Carmo-Pereira J 1993                                         | 0      | 36           | 0.0000                    | [0.0000; 0.0974]        | 0.8%          |
| Neri B 1993                                                  | 5      | 35           | 0.1429                    | [0.0481; 0.3026]        | 0.8%          |
| Jassem J 1993                                                | 13     | 189          | 0.0688                    | [0.0371; 0.1147]        | 1.2%          |
| Kuzel TM 1993                                                | 0      | 22           | 0.0000                    | [0.0000; 0.1544]        | 0.6%          |
| Citron ML 1992                                               | 1      | 86           | 0.0116                    | [0.0003; 0.0631]        | 1.0%          |
| Perit P 1991-A1                                              | 7      | 31           | 0.2258                    | [0.0959; 0.4110]        | 0.8%          |
| Perit P 1991-A2                                              | 6      | 29           | 0.2069                    | [0.0799; 0.3972]        | 0.7%          |
| Zamagni C 1991                                               | 3      | 30           | 0.1000                    | [0.0211; 0.2653]        | 0.7%          |
| Samonigg H 1990                                              | 0      | 21           | 0.0000                    | [0.0000; 0.1611]        | 0.6%          |
| <b>Random effects model</b>                                  |        | <b>18351</b> | <b>0.0233</b>             | <b>[0.0157; 0.0321]</b> | <b>100.0%</b> |
| Heterogeneity: $I^2 = 84\%$ , $\tau^2 = 0.0109$ , $p < 0.01$ |        |              |                           |                         |               |
|                                                              |        |              | 0 0.1 0.2 0.3 0.4 0.5 0.6 |                         |               |
