# Supplementary material
Source: MDPI journal article supplement (https://www.mdpi.com/1424-8247/16/4/510)
Supplement: s1 [file s1]

| Study                            | Events | Total |  | Proportion | 95%-CI           | Weight |
|----------------------------------|--------|-------|--|------------|------------------|--------|
| Abdel-Rahman O 2019              | 255    | 3223  |  | 0.0791     | [0.0700; 0.0890] | 0.6%   |
| Ackland SP 2001-A1               | 15     | 218   |  | 0.0688     | [0.0390; 0.1109] | 0.6%   |
| Ackland SP 2001-A2               | 1      | 236   |  | 0.0042     | [0.0001; 0.0234] | 0.6%   |
| Aimar G 2020                     | 20     | 135   |  | 0.1481     | [0.0929; 0.2195] | 0.5%   |
| Akhtar SS 1993                   | 8      | 100   |  | 0.0800     | [0.0352; 0.1516] | 0.5%   |
| Alderson D 2017-A1               | 15     | 446   |  | 0.0336     | [0.0189; 0.0549] | 0.6%   |
| Alderson D 2017-A2               | 20     | 441   |  | 0.0454     | [0.0279; 0.0692] | 0.6%   |
| Alonso MC 1995-A1                | 3      | 50    |  | 0.0600     | [0.0125; 0.1655] | 0.5%   |
| Alonso MC 1995-A2                | 6      | 50    |  | 0.1200     | [0.0453; 0.2431] | 0.5%   |
| Andersson M 1999-A1              | 1      | 161   |  | 0.0062     | [0.0002; 0.0341] | 0.5%   |
| Andersson M 1999-A2              | 0      | 181   |  | 0.0000     | [0.0000; 0.0202] | 0.6%   |
| Ardavanis A 2008                 | 2      | 34    |  | 0.0588     | [0.0072; 0.1968] | 0.4%   |
| Baghi M 2006                     | 1      | 24    |  | 0.0417     | [0.0011; 0.2112] | 0.4%   |
| Balloni L 2000                   | 0      | 25    |  | 0.0000     | [0.0000; 0.1372] | 0.4%   |
| Bascioni R 1997                  | 2      | 46    |  | 0.0435     | [0.0053; 0.1484] | 0.4%   |
| Bathe OF 2009                    | 1      | 35    |  | 0.0286     | [0.0007; 0.1492] | 0.4%   |
| Baur M 2010                      | 4      | 71    |  | 0.0563     | [0.0156; 0.1380] | 0.5%   |
| Becouarn YH 1996                 | 4      | 86    |  | 0.0465     | [0.0128; 0.1148] | 0.5%   |
| Berruti A 2005                   | 2      | 53    |  | 0.0377     | [0.0046; 0.1298] | 0.5%   |
| Berruti A 2005                   | 5      | 61    |  | 0.0820     | [0.0272; 0.1810] | 0.5%   |
| Birkenhake S 1999                | 0      | 25    |  | 0.0000     | [0.0000; 0.1372] | 0.4%   |
| Blajman C 1999                   | 7      | 85    |  | 0.0824     | [0.0338; 0.1623] | 0.5%   |
| Blijham GH 1996                  | 3      | 312   |  | 0.0096     | [0.0020; 0.0278] | 0.6%   |
| Blum JL 1999                     | 0      | 162   |  | 0.0000     | [0.0000; 0.0225] | 0.5%   |
| Blum JL 2001                     | 0      | 74    |  | 0.0000     | [0.0000; 0.0486] | 0.5%   |
| Buzdar AU 2007-A1                | 2      | 19    |  | 0.1053     | [0.0130; 0.3314] | 0.3%   |
| Buzdar AU 2007-A2                | 0      | 45    |  | 0.0000     | [0.0000; 0.0787] | 0.4%   |
| Carmo-Pereira J 1993             | 0      | 36    |  | 0.0000     | [0.0000; 0.0974] | 0.4%   |
| Carmo-Pereira J 1995             | 0      | 38    |  | 0.0000     | [0.0000; 0.0925] | 0.4%   |
| Cetin B 2012                     | 0      | 203   |  | 0.0000     | [0.0000; 0.0180] | 0.6%   |
| Ceyhan C 2005                    | 2      | 37    |  | 0.0541     | [0.0066; 0.1819] | 0.4%   |
| Chen EY 2018                     | 8      | 47    |  | 0.1702     | [0.0765; 0.3081] | 0.4%   |
| Chua YJ 2010                     | 7      | 105   |  | 0.0667     | [0.0272; 0.1325] | 0.5%   |
| Citron ML 1992                   | 4      | 86    |  | 0.0465     | [0.0128; 0.1148] | 0.5%   |
| Colozza M 1996                   | 0      | 28    |  | 0.0000     | [0.0000; 0.1234] | 0.4%   |
| Conroy T 2021                    | 1      | 163   |  | 0.0061     | [0.0002; 0.0337] | 0.5%   |
| Daniele B 2003                   | 2      | 34    |  | 0.0588     | [0.0072; 0.1968] | 0.4%   |
| de Forni M 1992                  | 28     | 367   |  | 0.0763     | [0.0513; 0.1084] | 0.6%   |
| Delaloge S 2020                  | 7      | 628   |  | 0.0111     | [0.0045; 0.0228] | 0.6%   |
| Dencausse Y 2001                 | 1      | 21    |  | 0.0476     | [0.0012; 0.2382] | 0.3%   |
| Depondt J 1993                   | 2      | 150   |  | 0.0133     | [0.0016; 0.0473] | 0.5%   |
| Dipetrillo T 2012                | 1      | 26    |  | 0.0385     | [0.0010; 0.1964] | 0.4%   |
| Docl R 1996                      | 1      | 35    |  | 0.0286     | [0.0007; 0.1492] | 0.4%   |
| Dyhl-Polk A 2020(1)              | 28     | 108   |  | 0.2593     | [0.1797; 0.3525] | 0.5%   |
| Dyhl-Polk A 2020(2)-A1           | 52     | 995   |  | 0.0523     | [0.0393; 0.0680] | 0.6%   |
| Dyhl-Polk A 2020(2)-A2           | 51     | 1241  |  | 0.0411     | [0.0307; 0.0537] | 0.6%   |
| ECOG-E1103/ Li TH 2004/2012      | 11     | 68    |  | 0.1618     | [0.0836; 0.2710] | 0.5%   |
| ECOG-E2200/Giantonio BJ 2006     | 22     | 87    |  | 0.2529     | [0.1658; 0.3575] | 0.5%   |
| ECOG-E2204/ Berlin DJ 2006/2018  | 18     | 130   |  | 0.1385     | [0.0842; 0.2100] | 0.5%   |
| ECOG-E3204/ Landry JC 2006/2015  | 8      | 55    |  | 0.1455     | [0.0650; 0.2666] | 0.5%   |
| ECOG-E3205/ Garg MK 2007/2017    | 2      | 62    |  | 0.0323     | [0.0039; 0.1117] | 0.5%   |
| ECOG-E4203/ Meropol NJ 2005/2018 | 13     | 205   |  | 0.0634     | [0.0342; 0.1060] | 0.6%   |
| Elomaa I 2003                    | 2      | 40    |  | 0.0500     | [0.0061; 0.1692] | 0.4%   |
| Emmanouilides C 2006             | 2      | 53    |  | 0.0377     | [0.0046; 0.1298] | 0.5%   |
| Erman M 2005                     | 7      | 88    |  | 0.0795     | [0.0326; 0.1570] | 0.5%   |
| Eskilsson J 1988                 | 14     | 76    |  | 0.1842     | [0.1045; 0.2897] | 0.5%   |
| Eskilsson J 1990                 | 8      | 58    |  | 0.1379     | [0.0615; 0.2538] | 0.5%   |
| Feliu J 2005                     | 1      | 51    |  | 0.0196     | [0.0005; 0.1045] | 0.5%   |
| Fetting JH 1998-A1               | 15     | 307   |  | 0.0489     | [0.0276; 0.0793] | 0.6%   |
| Fetting JH 1998-A2               | 31     | 309   |  | 0.1003     | [0.0692; 0.1394] | 0.6%   |
| Gebbia V 1996                    | 2      | 33    |  | 0.0606     | [0.0074; 0.2023] | 0.4%   |
| Geyer CE 2006-A1                 | 4      | 163   |  | 0.0245     | [0.0067; 0.0616] | 0.5%   |
| Geyer CE 2006-A2                 | 0      | 161   |  | 0.0000     | [0.0000; 0.0227] | 0.5%   |
| Gianni L 2005                    | 151    | 1233  |  | 0.1225     | [0.1047; 0.1421] | 0.6%   |
| Giordano KF 2006                 | 8      | 44    |  | 0.1818     | [0.0819; 0.3271] | 0.4%   |
| Giuliani F 2008                  | 1      | 41    |  | 0.0244     | [0.0006; 0.1286] | 0.4%   |
| Gradishar W 1991                 | 15     | 244   |  | 0.0615     | [0.0348; 0.0994] | 0.6%   |
| Greil R 2011                     | 6      | 293   |  | 0.0205     | [0.0076; 0.0440] | 0.6%   |
| Haarstad H 1994                  | 3      | 30    |  | 0.1000     | [0.0211; 0.2653] | 0.4%   |
| Haas NB 1995                     | 2      | 38    |  | 0.0526     | [0.0064; 0.1775] | 0.4%   |
| Hainsworth JD 1996               | 2      | 46    |  | 0.0435     | [0.0053; 0.1484] | 0.4%   |
| Harbeck N 2017                   | 37     | 102   |  | 0.3627     | [0.2698; 0.4639] | 0.5%   |
| Hartung G 1996-A1                | 0      | 16    |  | 0.0000     | [0.0000; 0.2059] | 0.3%   |
| Hartung G 1996-A2                | 1      | 29    |  | 0.0345     | [0.0009; 0.1776] | 0.4%   |
| Hartung G 2001                   | 2      | 51    |  | 0.0392     | [0.0048; 0.1346] | 0.5%   |
| Hasbini A 1999                   | 2      | 44    |  | 0.0455     | [0.0056; 0.1547] | 0.4%   |
| Havsteen H 1989                  | 1      | 11    |  | 0.0909     | [0.0023; 0.4128] | 0.2%   |
| Hayashi Y 2019                   | 13     | 80    |  | 0.1625     | [0.0895; 0.2618] | 0.5%   |
| Hitt R 2002                      | 4      | 70    |  | 0.0571     | [0.0158; 0.1399] | 0.5%   |
| Hofheinz RD 2021                 | 1      | 56    |  | 0.0179     | [0.0005; 0.0955] | 0.5%   |
| Hu W 2010-A1                     | 2      | 34    |  | 0.0588     | [0.0072; 0.1968] | 0.4%   |
| Hu W 2010-A2                     | 9      | 37    |  | 0.2432     | [0.1177; 0.4120] | 0.4%   |
| Jassem J 1993                    | 20     | 189   |  | 0.1058     | [0.0658; 0.1587] | 0.6%   |
| Jassem J 2001                    | 16     | 123   |  | 0.1301     | [0.0762; 0.2026] | 0.5%   |
| Jensen SA 2006                   | 29     | 668   |  | 0.0434     | [0.0293; 0.0618] | 0.6%   |
| Jensen SA 2011                   | 9      | 106   |  | 0.0849     | [0.0396; 0.1551] | 0.5%   |
| Jeremic B 1990                   | 12     | 80    |  | 0.1500     | [0.0800; 0.2474] | 0.5%   |
| Jin X 2019                       | 38     | 129   |  | 0.2946     | [0.2176; 0.3812] | 0.5%   |
| Joensuu H 2009-A1                | 8      | 115   |  | 0.0696     | [0.0305; 0.1325] | 0.5%   |
| Joensuu H 2009-A2                | 12     | 116   |  | 0.1034     | [0.0546; 0.1737] | 0.5%   |
| Kachnic LA 2022                  | 2      | 52    |  | 0.0385     | [0.0047; 0.1321] | 0.5%   |
| Kato K 2010                      | 23     | 76    |  | 0.3026     | [0.2025; 0.4187] | 0.5%   |
| Katona C 1998                    | 4      | 96    |  | 0.0417     | [0.0115; 0.1033] | 0.5%   |
| Keene KS 2005                    | 1      | 28    |  | 0.0357     | [0.0009; 0.1835] | 0.4%   |
| Kerr RS 2016-A1                  | 73     | 973   |  | 0.0750     | [0.0593; 0.0934] | 0.6%   |
| Kerr RS 2016-A2                  | 75     | 968   |  | 0.0775     | [0.0614; 0.0962] | 0.6%   |
| Khan MA 2012                     | 60     | 301   |  | 0.1993     | [0.1557; 0.2490] | 0.6%   |
| Klastersky J 1994                | 25     | 182   |  | 0.1374     | [0.0909; 0.1961] | 0.6%   |
| Klautke G 2006                   | 1      | 28    |  | 0.0357     | [0.0009; 0.1835] | 0.4%   |
| Koca D 2011                      | 18     | 52    |  |            |                  |        |
